# Supplementary material for: Synthesis, characterization and spectroscopic properties of water soluble coumarins substituted with oligomeric alkoxy functions
Source: Royal Society of Chemistry journal article supplement (doi:10.1039/c3ra46704j), 2014-01-01
Supplement: c3ra46704j1.pdf [file c3ra46704j1.pdf]

## Synthesis, characterization and spectroscopic properties of water soluble coumarins substituted with oligomeric alkoxy functions

H. Surya Prakash Rao,\* Mohan Babu. B and Avinash Desai

Department of Chemistry, Pondicherry University, Pondicherry – 605 014 INDIA

[hspr.che@pondiuni.edu.in](mailto:hspr.che@pondiuni.edu.in)

### Supplementary data

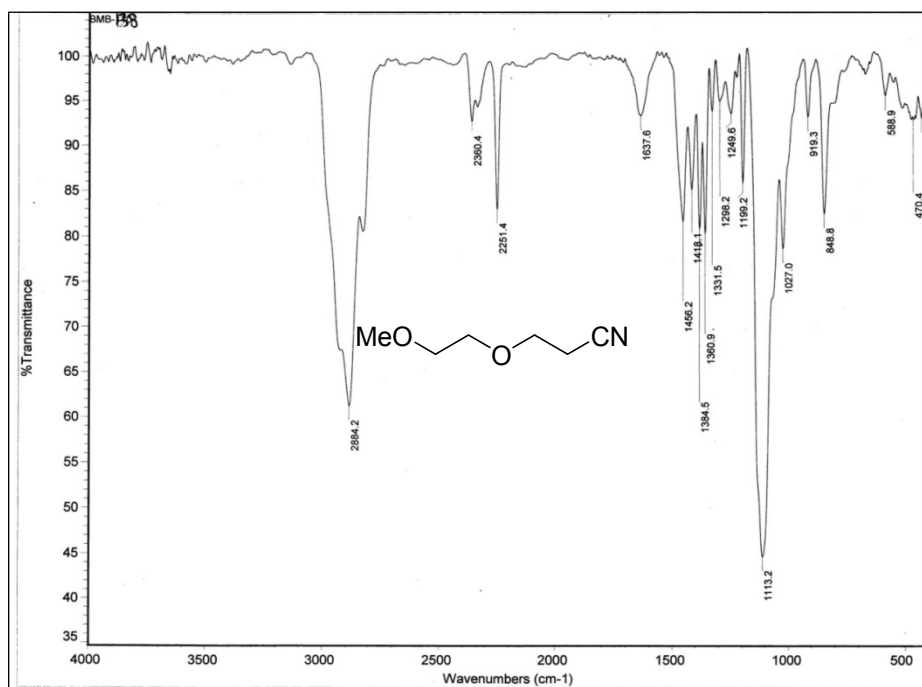

**Figure 7.** IR (KBr) spectrum of 3-(2-methoxyethoxy)propanenitrile **6a**.

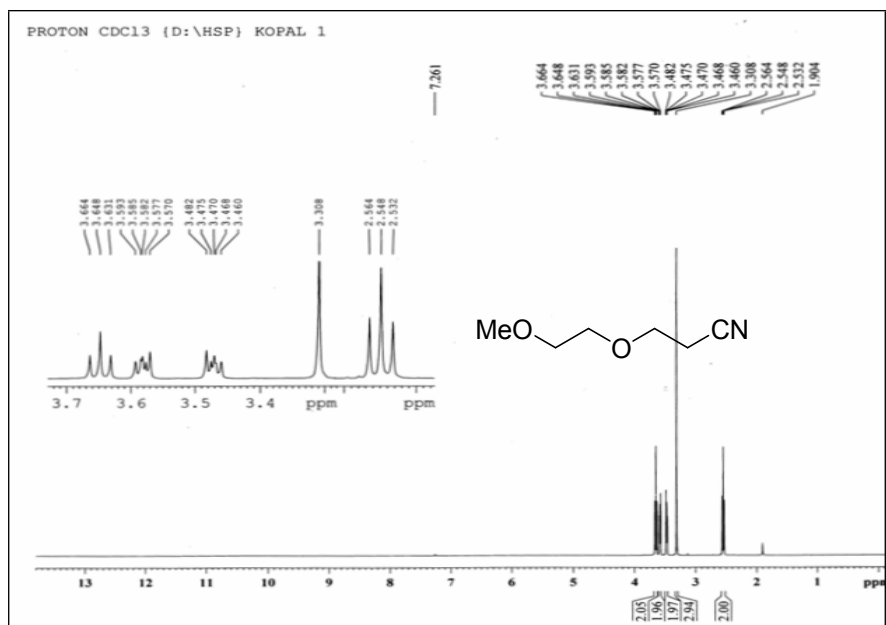

**Figure 8.**  $^1\text{H}$  NMR (400 MHz,  $\text{CCl}_4 + \text{CDCl}_3$ , 1:1) spectrum of 3-(2-methoxyethoxy)propanenitrile **6a**.

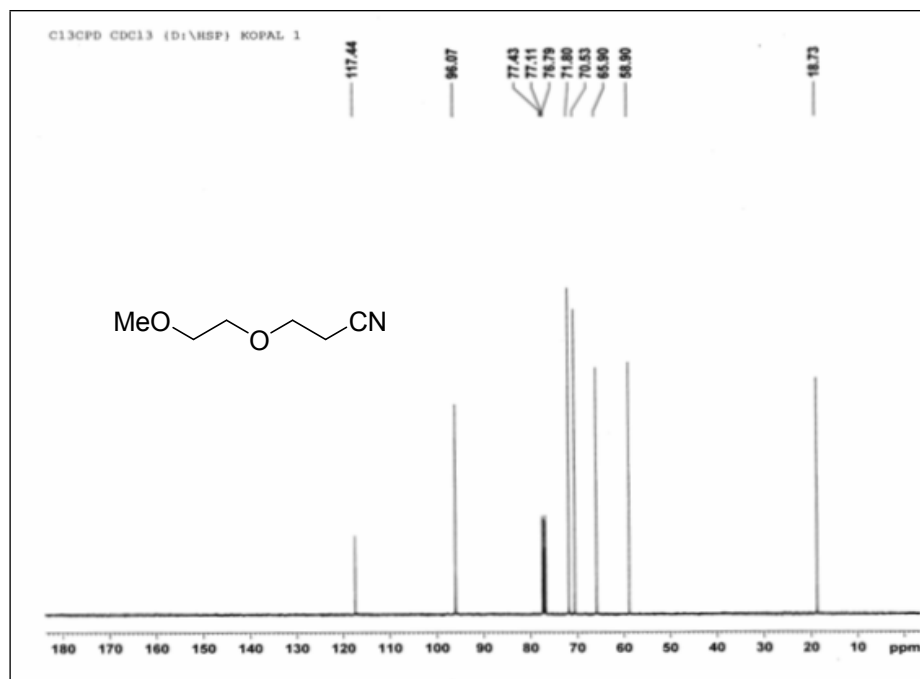

**Figure 9.**  $^{13}\text{C}$  NMR (100 MHz,  $\text{CCl}_4 + \text{CDCl}_3$ , 1:1) spectrum of 3-(2-methoxyethoxy)propanenitrile **6a**.

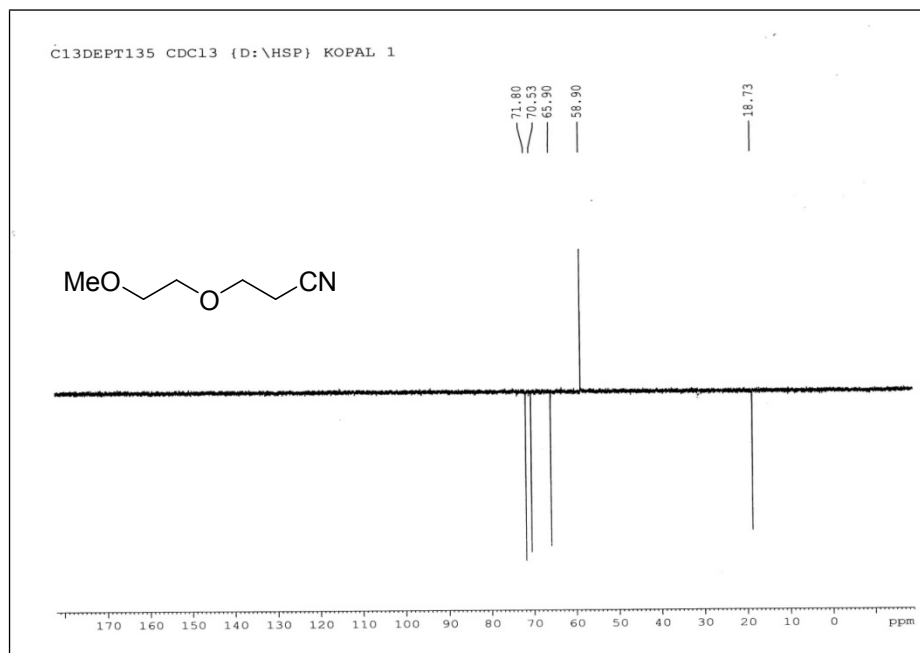

**Figure 10.** DEPT-135 NMR (100 MHz,  $\text{CCl}_4 + \text{CDCl}_3$ , 1:1) spectrum of 3-(2-methoxyethoxy)propanenitrile **6a**.

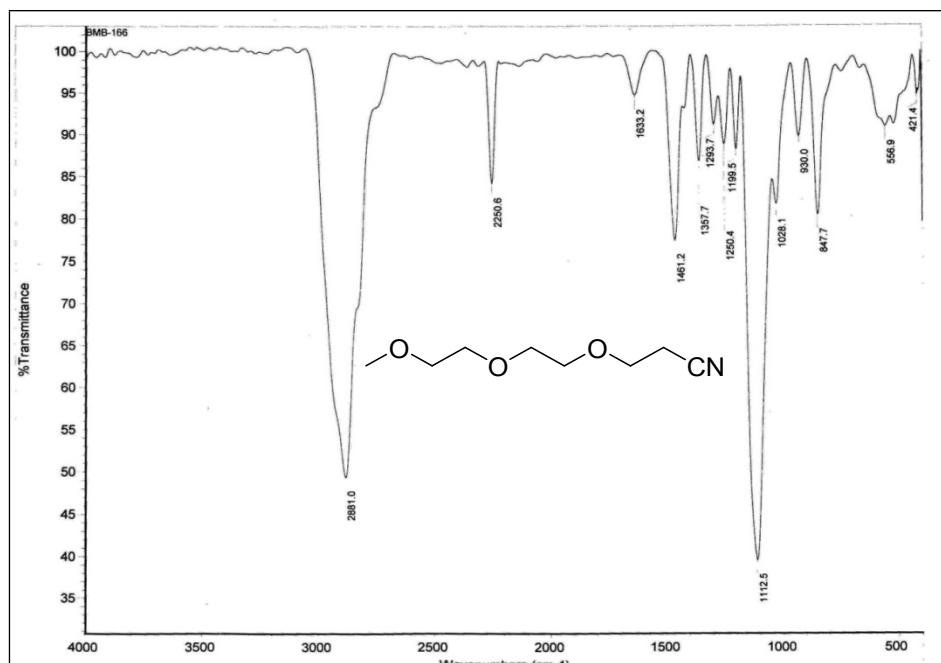

6b. **Figure 11.** IR (KBr) spectrum of 3-(2-(2-methoxyethoxy)ethoxy)propanenitrile

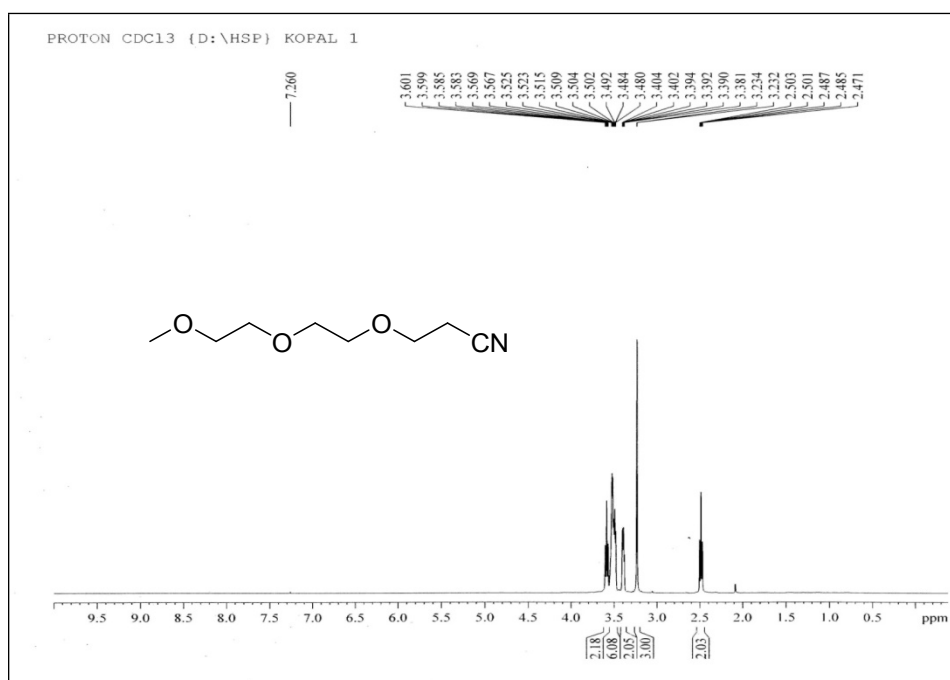

**Figure 12.**  $^1\text{H}$  NMR (400 MHz,  $\text{CCl}_4 + \text{CDCl}_3$ , 1:1) spectrum of 3-(2-(2-methoxyethoxy)ethoxy)propanenitrile **6b**.

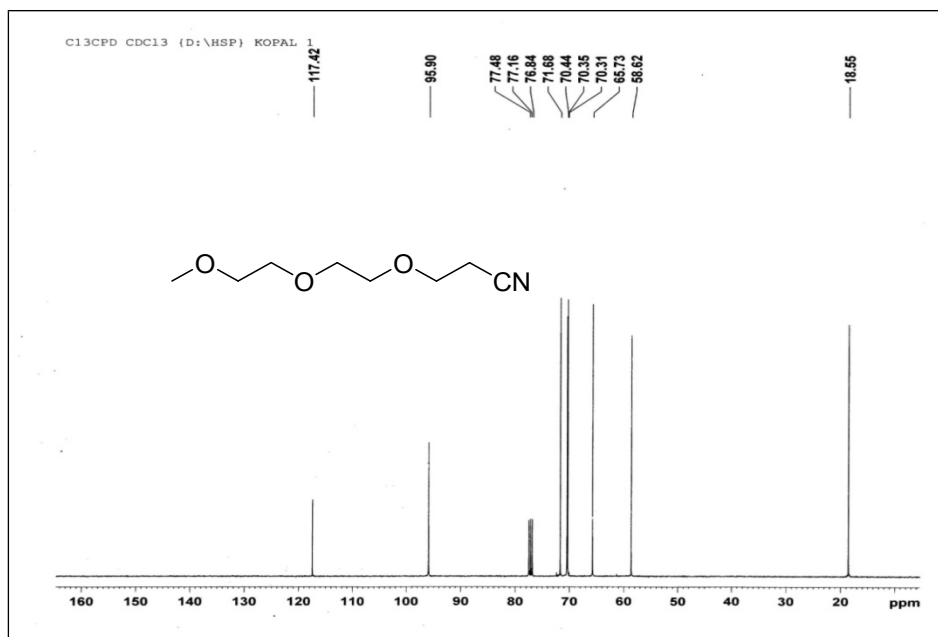

**Figure 13.** <sup>13</sup>C NMR (100 MHz, CCl<sub>4</sub> + CDCl<sub>3</sub>, 1:1) spectrum of 3-(2-(2-methoxyethoxy)ethoxy)propanenitrile **6b**.

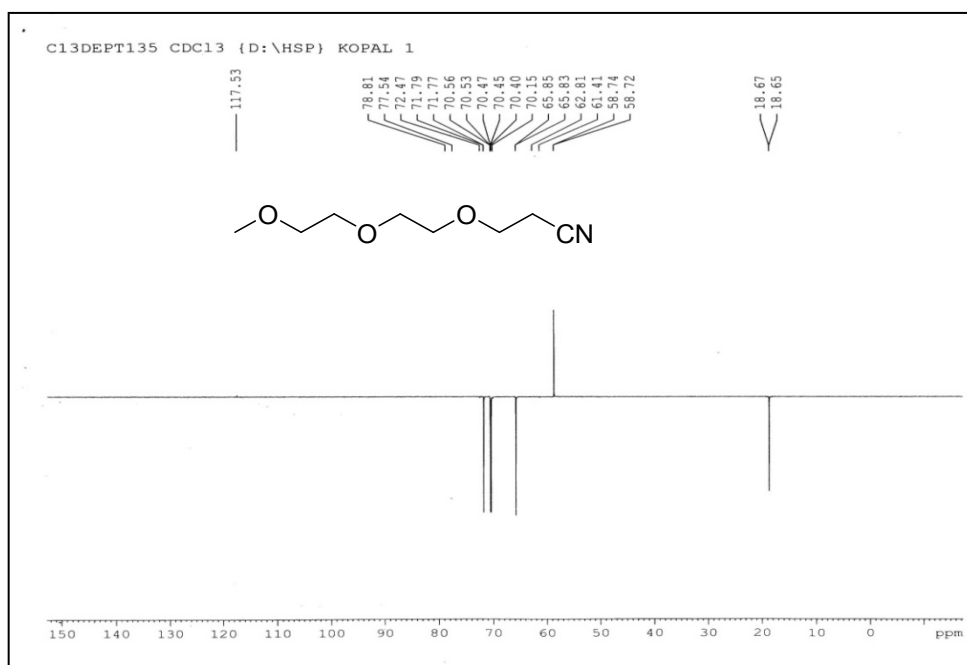

**Figure 14.** DEPT-135 NMR (100 MHz, CCl<sub>4</sub> + CDCl<sub>3</sub>, 1:1) spectrum of 3-(2-(2-methoxyethoxy)ethoxy)propanenitrile **6b**.

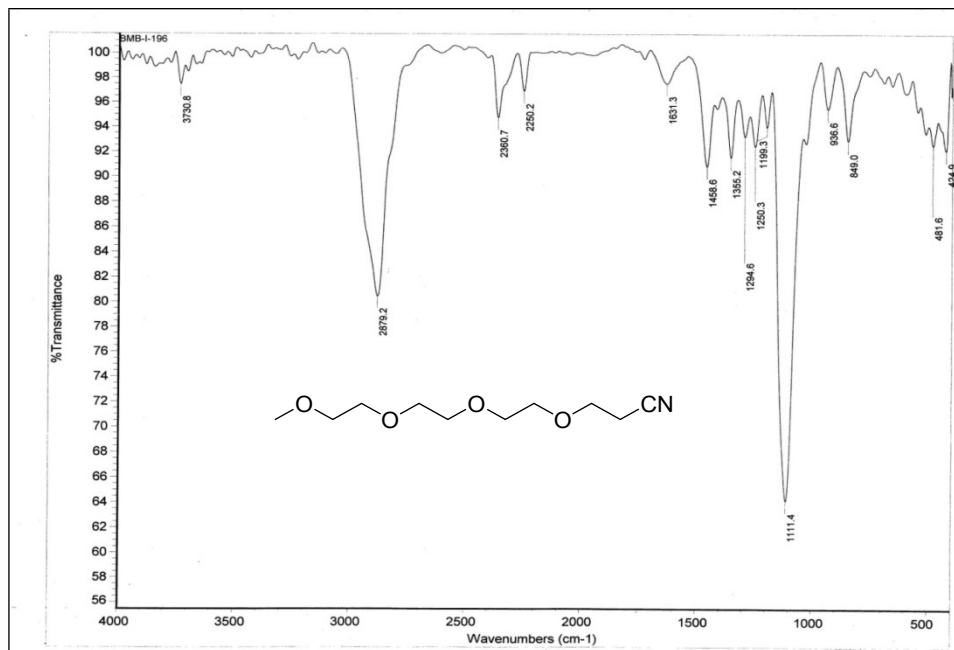

**Figure 15.** IR (KBr) spectrum of 2,5,8,11-tetraoxatetradecane-14-nitrile **6c**.

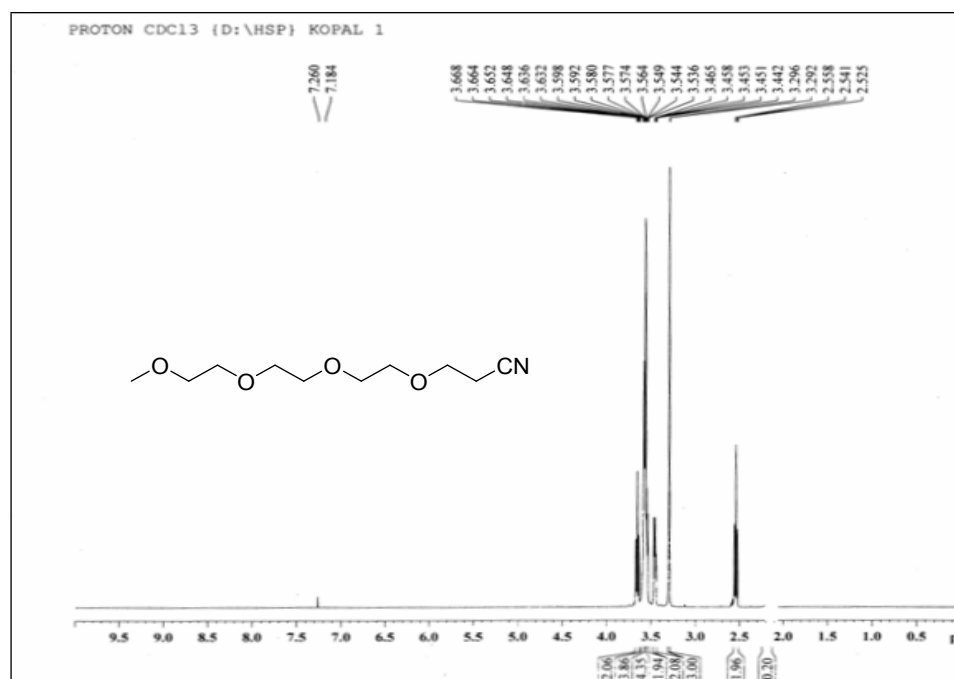

**Figure 16.**  $^1\text{H}$  NMR (400 MHz,  $\text{CCl}_4 + \text{CDCl}_3$ , 1:1) spectrum of 2,5,8,11-tetraoxatetradecane-14-nitrile **6c**.

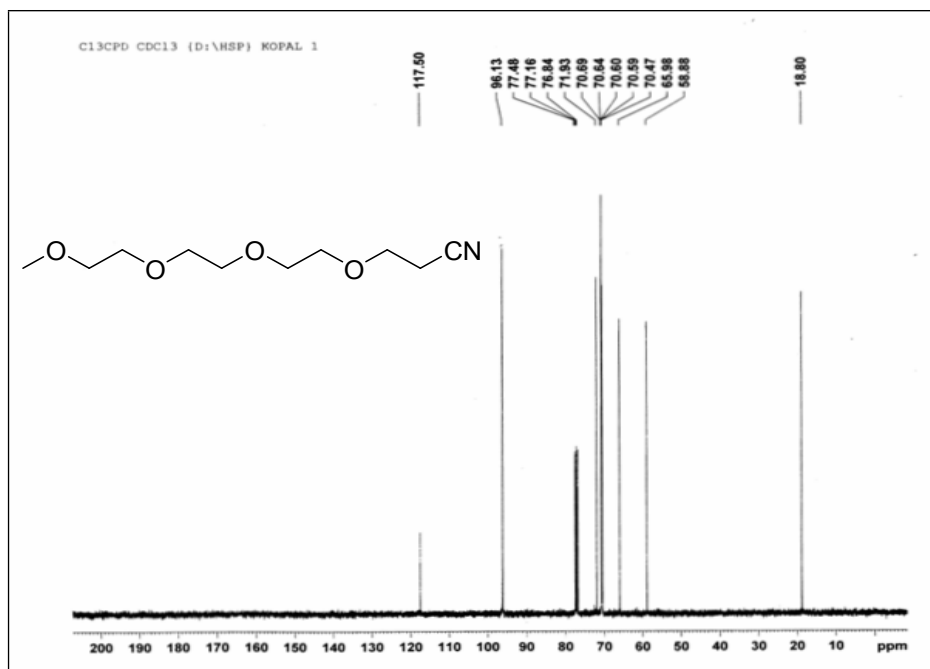

**Figure 17.**  $^{13}\text{C}$  NMR (100 MHz,  $\text{CCl}_4 + \text{CDCl}_3$ , 1:1) spectrum of 2,5,8,11-tetraoxatetradecane-14-nitrile **6c**.

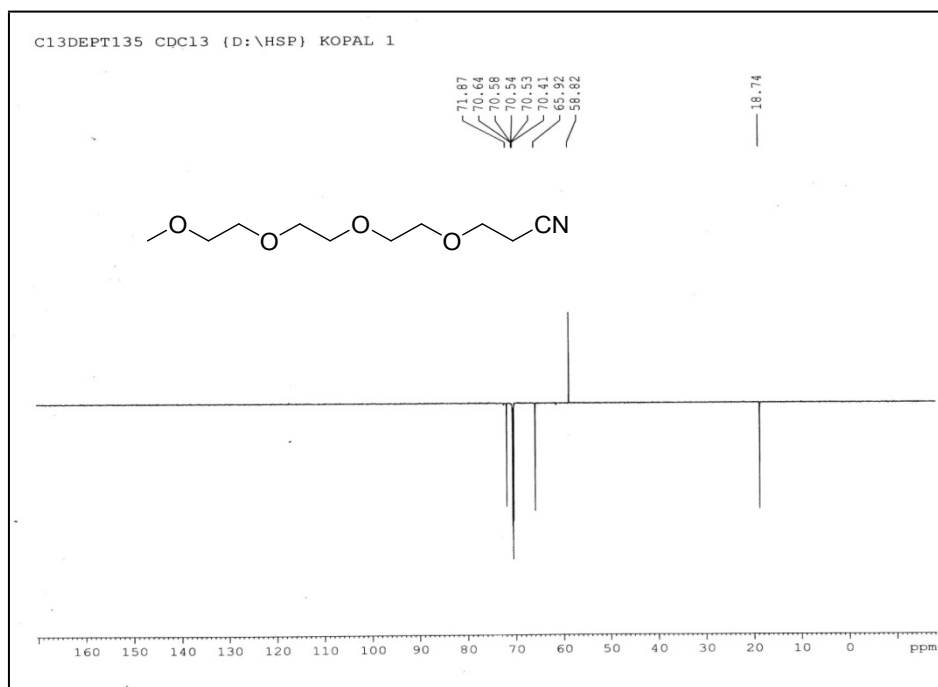

**Figure 18.** DEPT-135 NMR (100 MHz,  $\text{CCl}_4 + \text{CDCl}_3$ , 1:1) spectrum of 2,5,8,11-tetraoxatetradecane-14-nitrile **6c**.

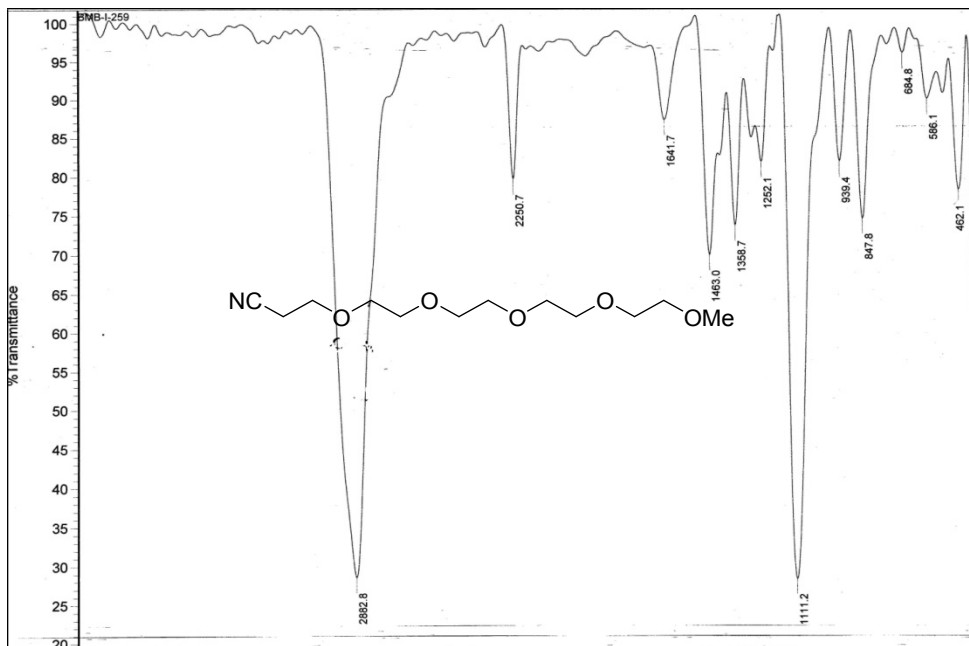

**Figure 19.** IR (KBr) spectrum of 2,5,8,11,14-pentaoxaheptadecane-17-nitrile **6d**.

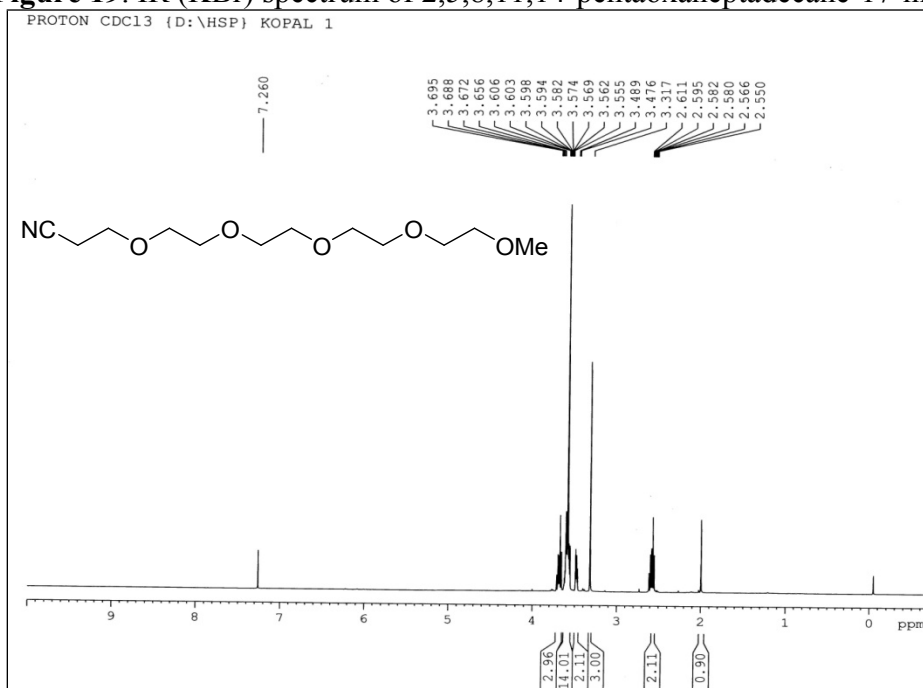

**Figure 20.** <sup>1</sup>H NMR (400 MHz, CCl<sub>4</sub> + CDCl<sub>3</sub>, 1:1) spectrum of 2,5,8,11,14-pentaoxaheptadecane-17-nitrile **6d**.



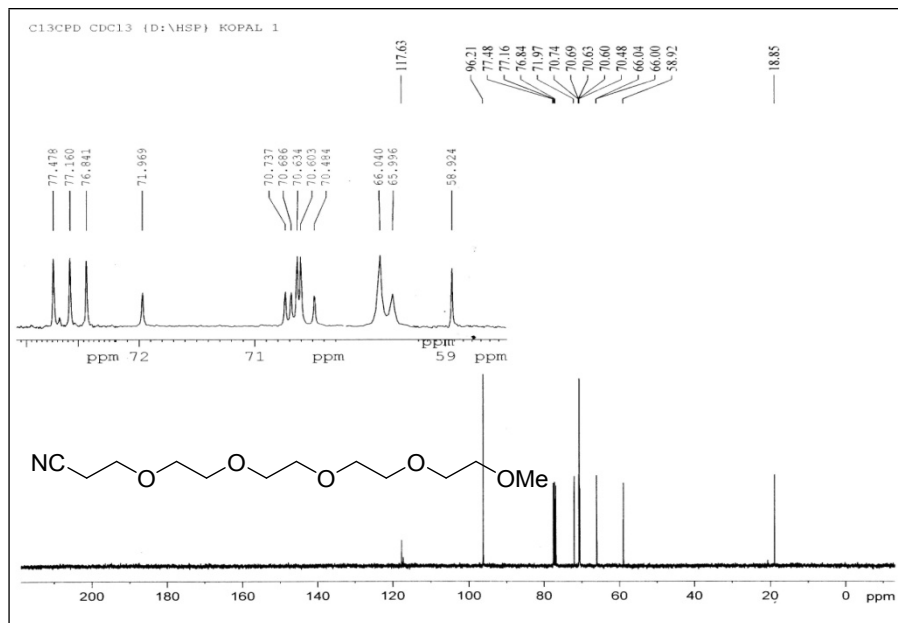

**Figure 21.** <sup>13</sup>C NMR (100 MHz, CCl<sub>4</sub> + CDCl<sub>3</sub>, 1:1) spectrum of 2,5,8,11,14-pentaoxaheptadecane-17-nitrile **6d**.

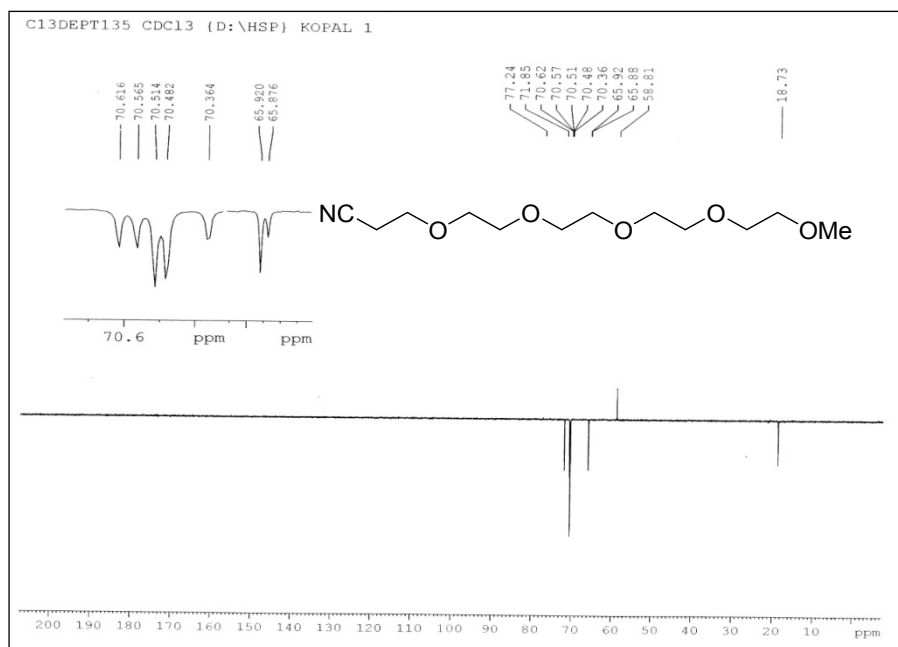

**Figure 22.** DEPT-135 NMR (100 MHz, CCl<sub>4</sub> + CDCl<sub>3</sub>, 1:1) spectrum of 2,5,8,11,14-pentaoxaheptadecane-17-nitrile **6d**.

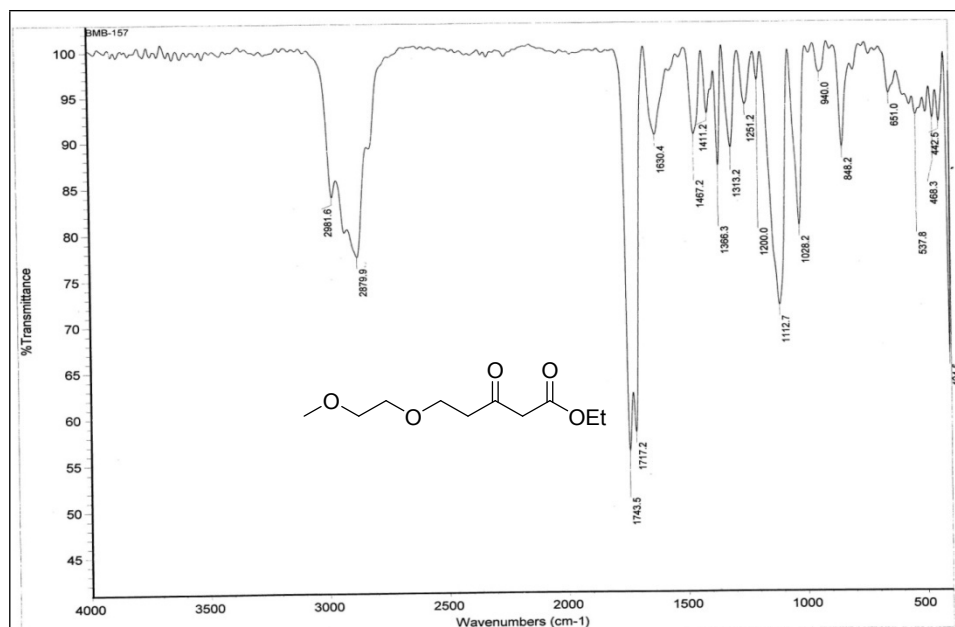

**Figure 23.** IR (KBr) spectrum of ethyl 5-(2-methoxyethoxy)-3-oxopentanoate **7a**.

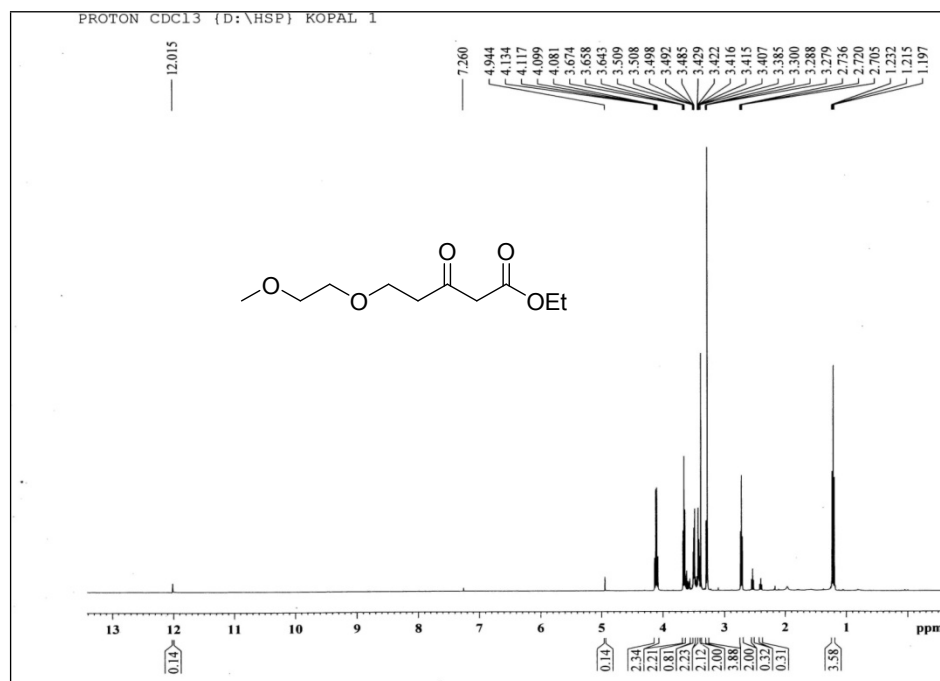

**Figure 24.** <sup>1</sup>H NMR (400 MHz, CCl<sub>4</sub> + CDCl<sub>3</sub>, 1:1) spectrum of ethyl 5-(2-methoxyethoxy)-3-oxopentanoate **7a**.

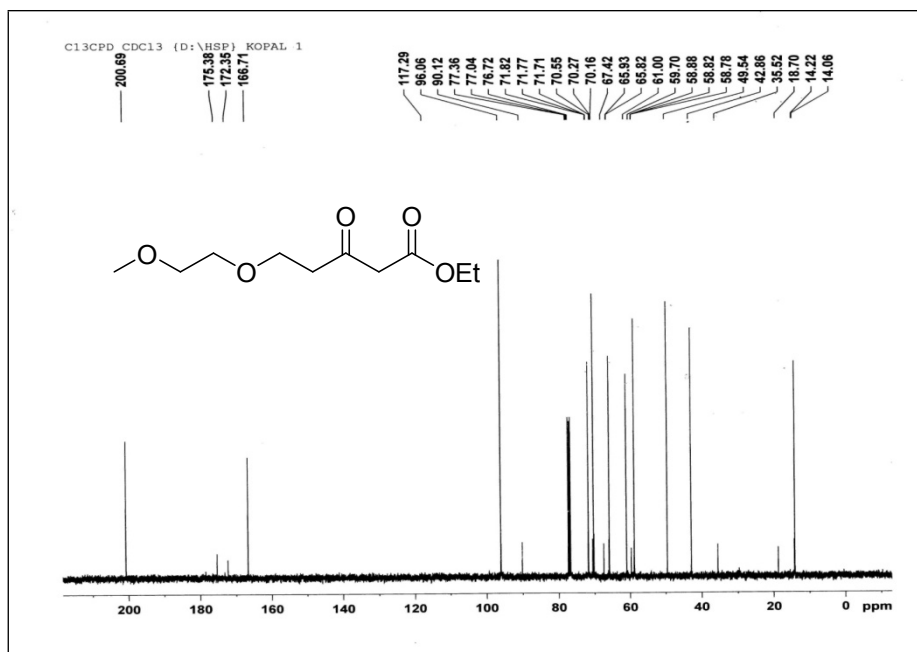

**Figure 25.**  $^{13}\text{C}$  NMR (100 MHz,  $\text{CCl}_4 + \text{CDCl}_3$ , 1:1) spectrum of ethyl 5-(2-methoxyethoxy)-3-oxopentanoate **7a**.

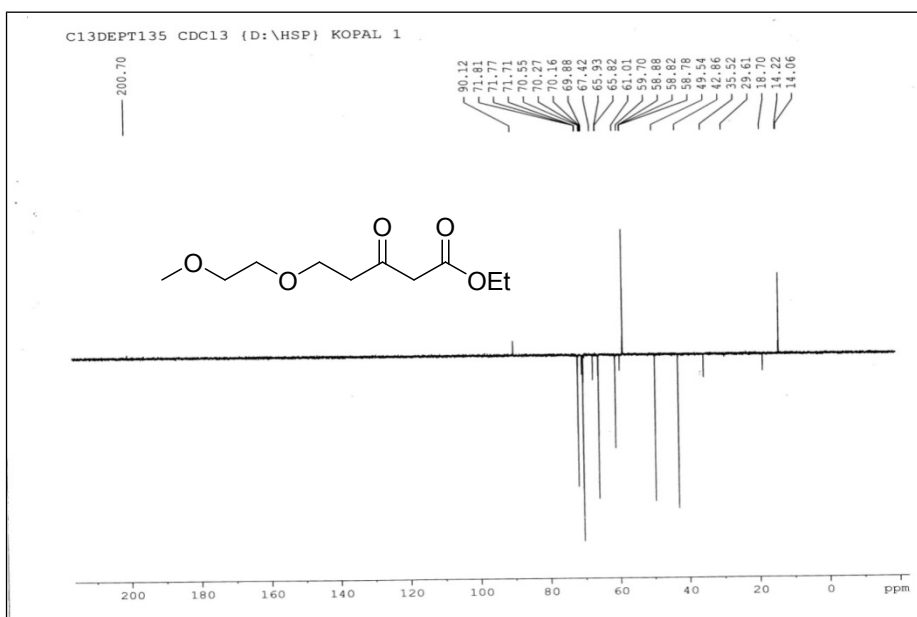

**Figure 26.** DEPT-135 NMR (100 MHz,  $\text{CCl}_4 + \text{CDCl}_3$ , 1:1) spectrum of ethyl 5-(2-methoxyethoxy)-3-oxopentanoate **7a**.

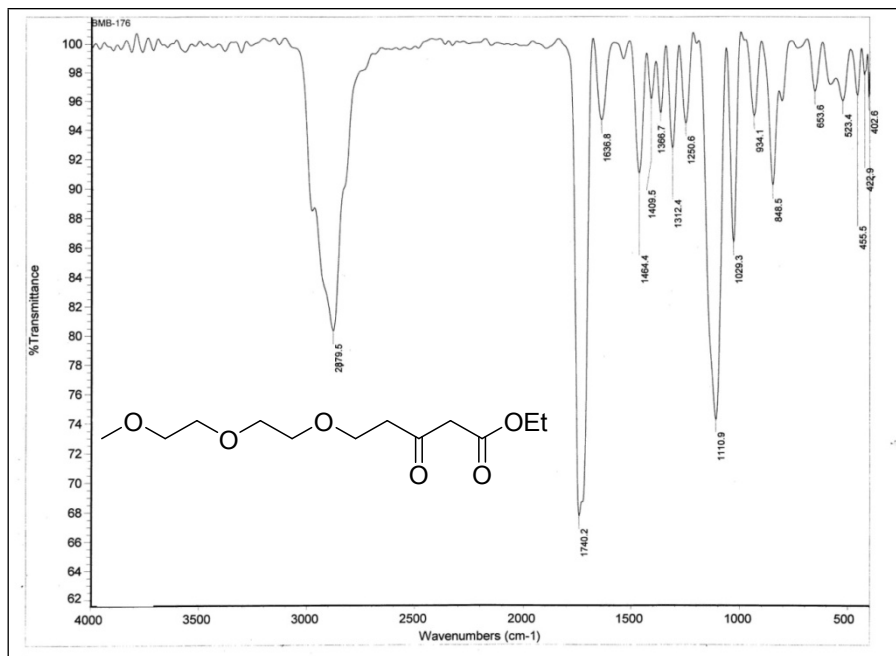

**Figure 27.** IR (KBr) spectrum of ethyl 5-(2-(2-methoxyethoxy)ethoxy)-3-oxopentanoate **7b**.

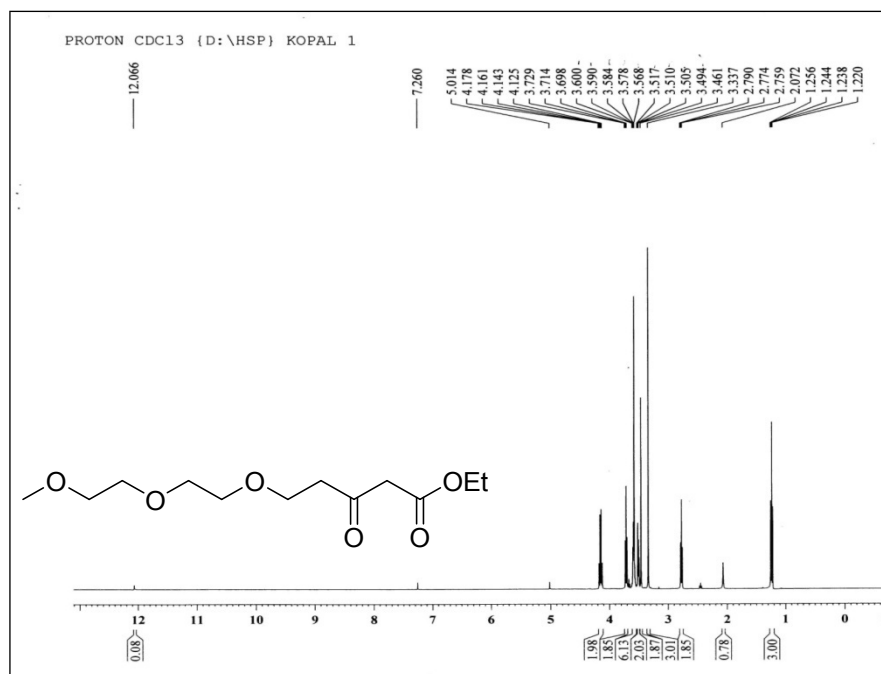

**Figure 28.** <sup>1</sup>H (400 MHz, CCl<sub>4</sub>+CDCl<sub>3</sub>, 1:1) spectrum of ethyl 5-(2-(2-methoxyethoxy)ethoxy)-3-oxopentanoate **7b**.

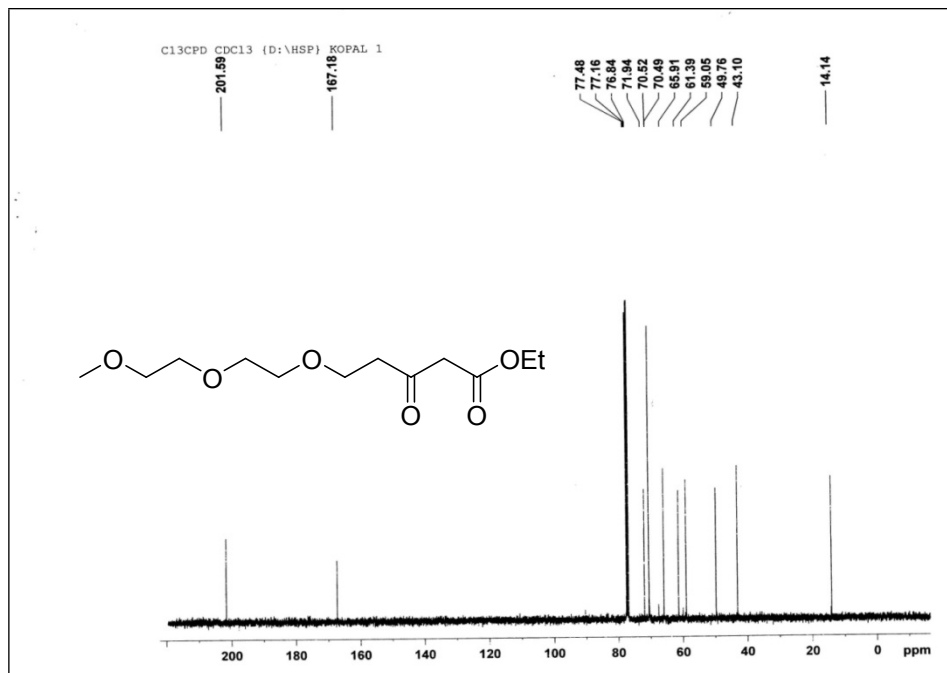

**Figure 29.**  $^{13}\text{C}$  NMR (100 MHz,  $\text{CCl}_4 + \text{CDCl}_3$ , 1:1) spectrum of ethyl 5-(2-(2-methoxyethoxy)ethoxy)-3-oxopentanoate **7b**.

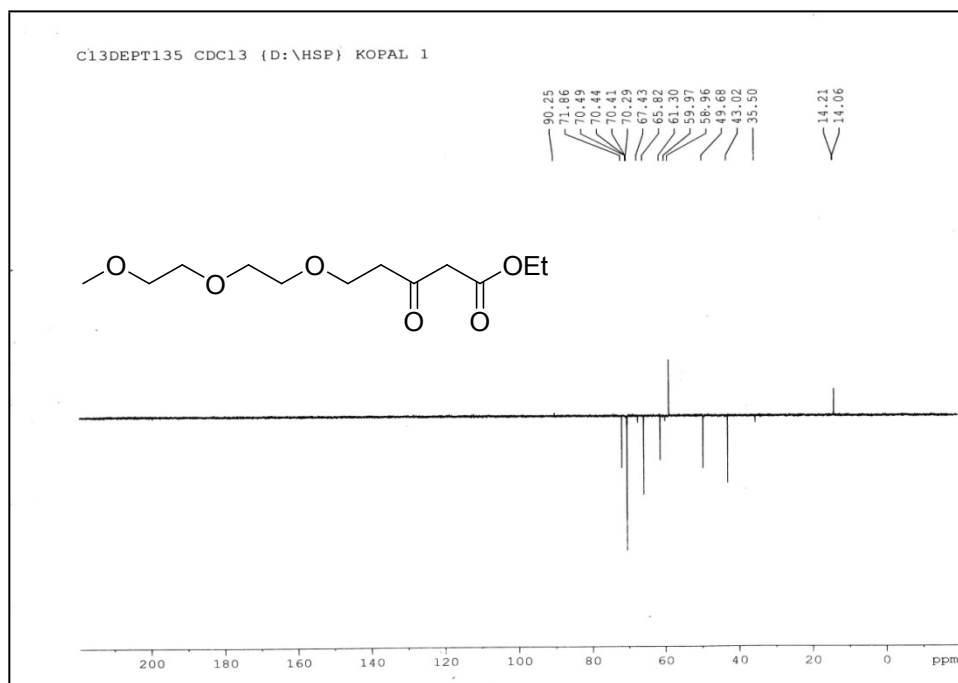

**Figure 30.** DEPT-135 NMR (100 MHz,  $\text{CCl}_4 + \text{CDCl}_3$ , 1:1) spectrum of ethyl 5-(2-(2-methoxyethoxy)ethoxy)-3-oxopentanoate **7b**.

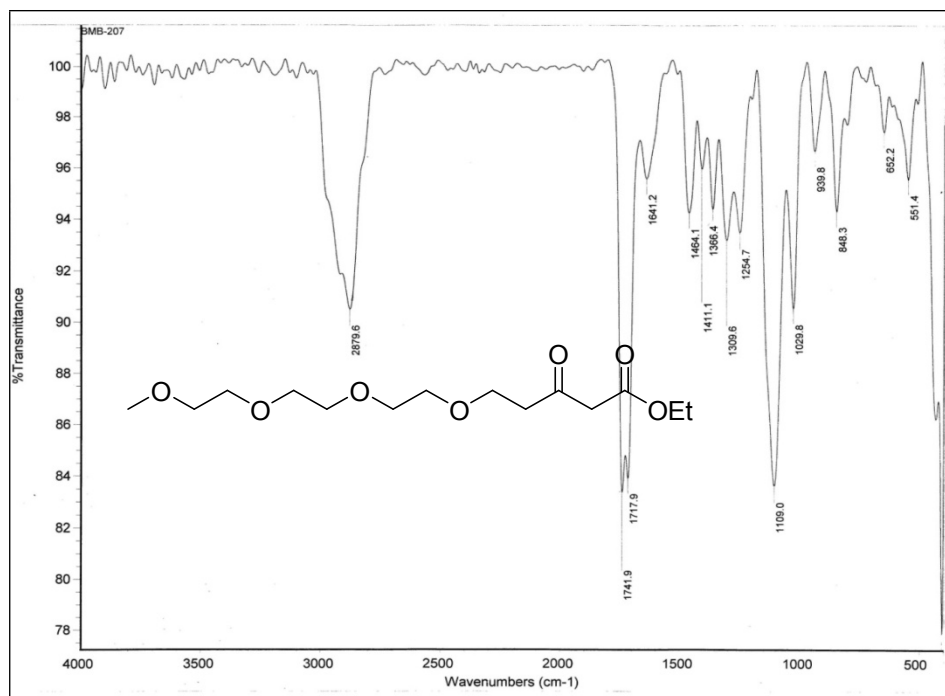

**Figure 31.** IR (KBr) spectrum of ethyl 14-oxo-2,5,8,11-tetraoxahexadecan-16-oate **7c**.

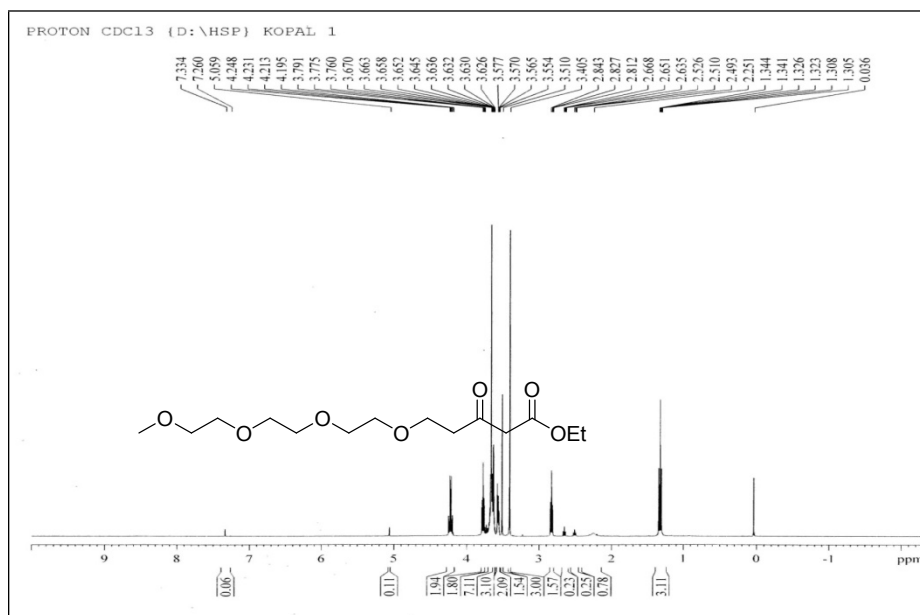

**Figure 32.** <sup>1</sup>H NMR (400 MHz, CCl<sub>4</sub> + CDCl<sub>3</sub>, 1:1) spectrum of ethyl 14-oxo-2,5,8,11-tetraoxahexadecan-16-oate **7c**.

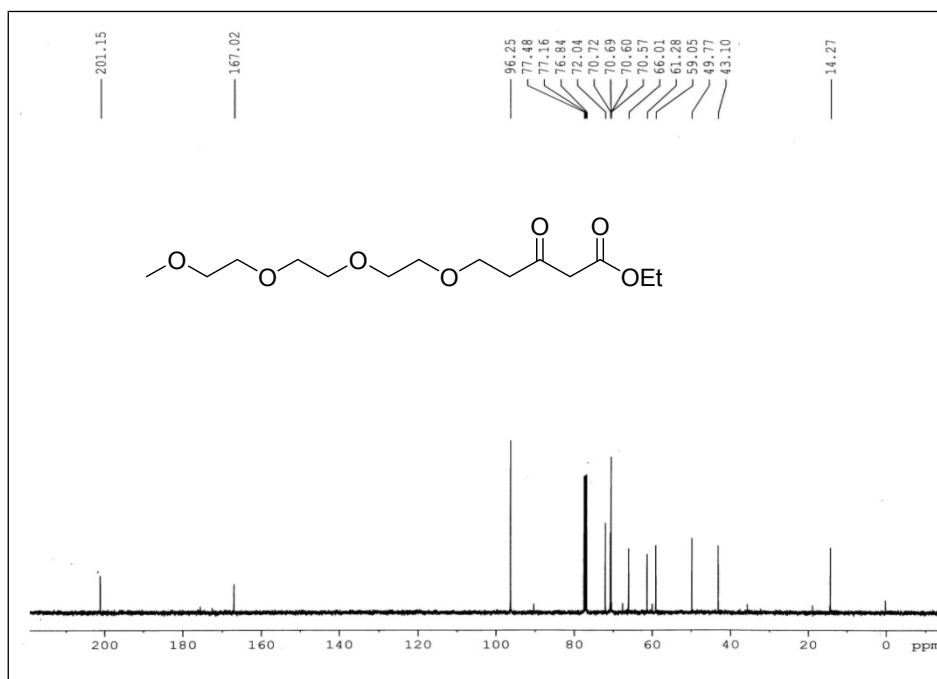

**Figure 33.** <sup>13</sup>C NMR (100 MHz, CCl<sub>4</sub> + CDCl<sub>3</sub>, 1:1) spectrum of ethyl 14-oxo-2,5,8,11-tetraoxahexadecan-16-oate **7c**.

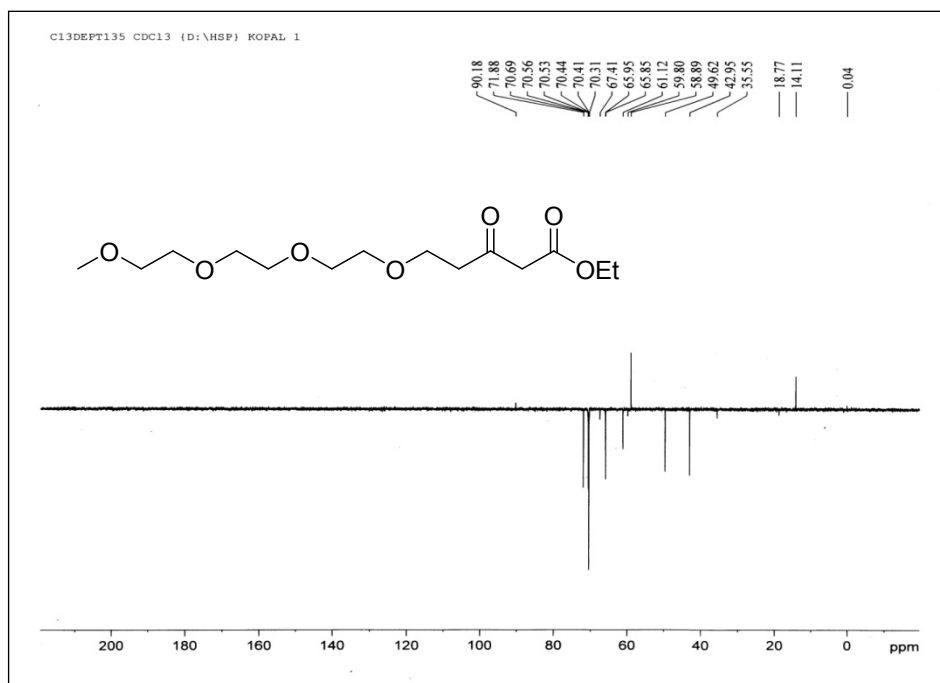

**Figure 34.** DEPT-135 NMR (100 MHz, CCl<sub>4</sub> + CDCl<sub>3</sub>, 1:1) spectrum of ethyl 14-oxo-2,5,8,11-tetraoxahexadecan-16-oate **7c**.

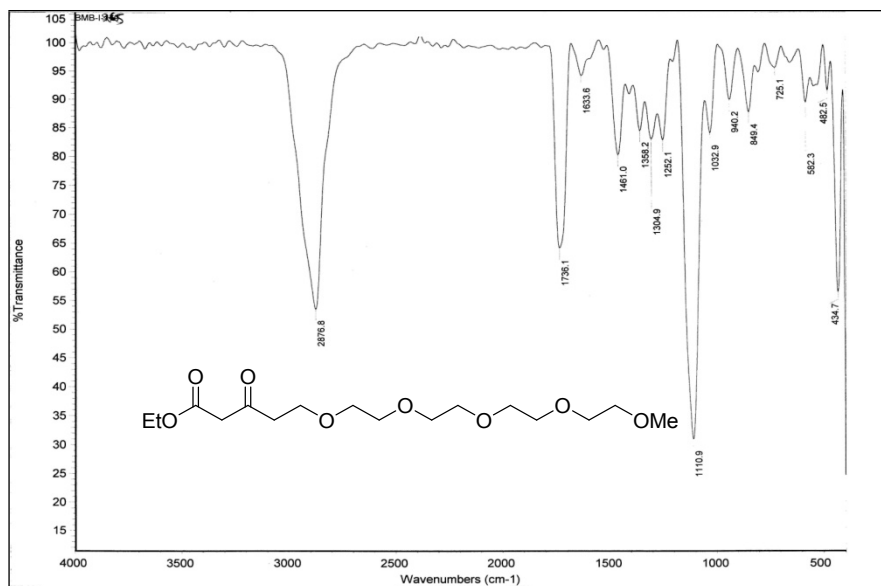

**Figure 35.** IR (KBr) spectrum of ethyl 17-oxo-2,5,8,11,14-pentaoxonadecan-19-oate **7d**.

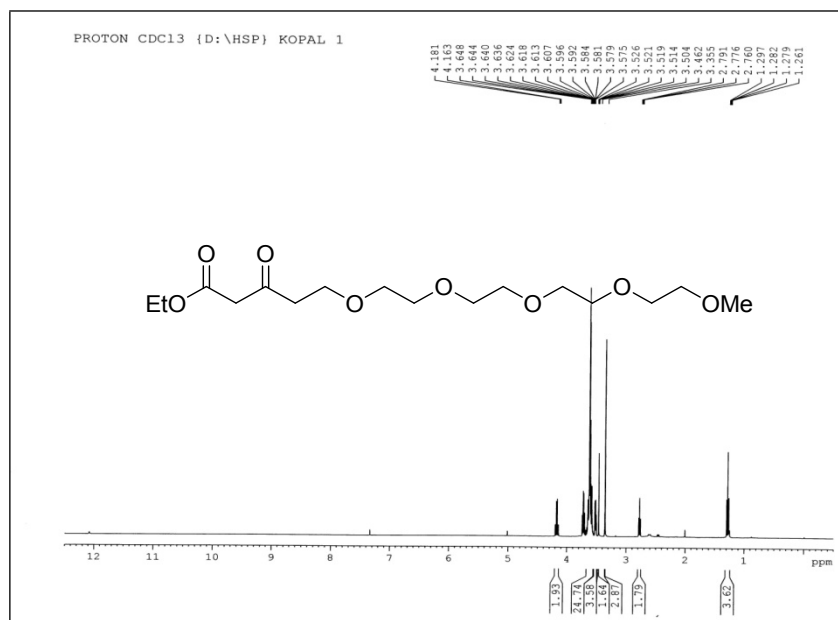

**Figure 36.** <sup>1</sup>H NMR (400 MHz, CCl<sub>4</sub> + CDCl<sub>3</sub>, 1:1) spectrum of ethyl 17-oxo-2,5,8,11,14-pentaoxonadecan-19-oate **7d**.



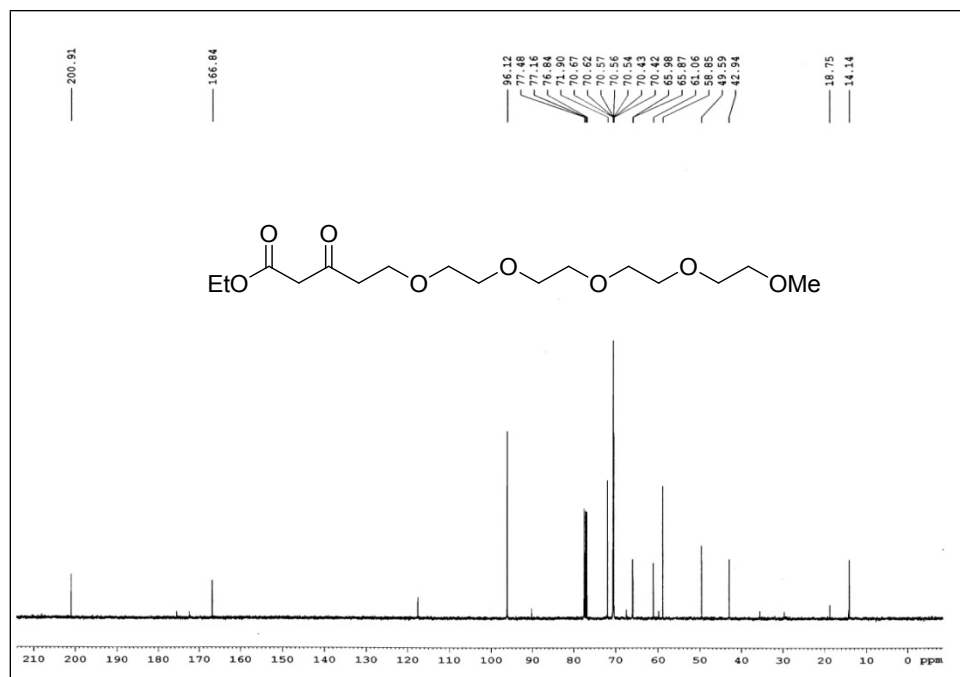

**Figure 37.** <sup>13</sup>C NMR (100 MHz, CCl<sub>4</sub> + CDCl<sub>3</sub>, 1:1) spectrum of ethyl 17-oxo-2,5,8,11,14-pentaoxonadecan-19-oate **7d**.

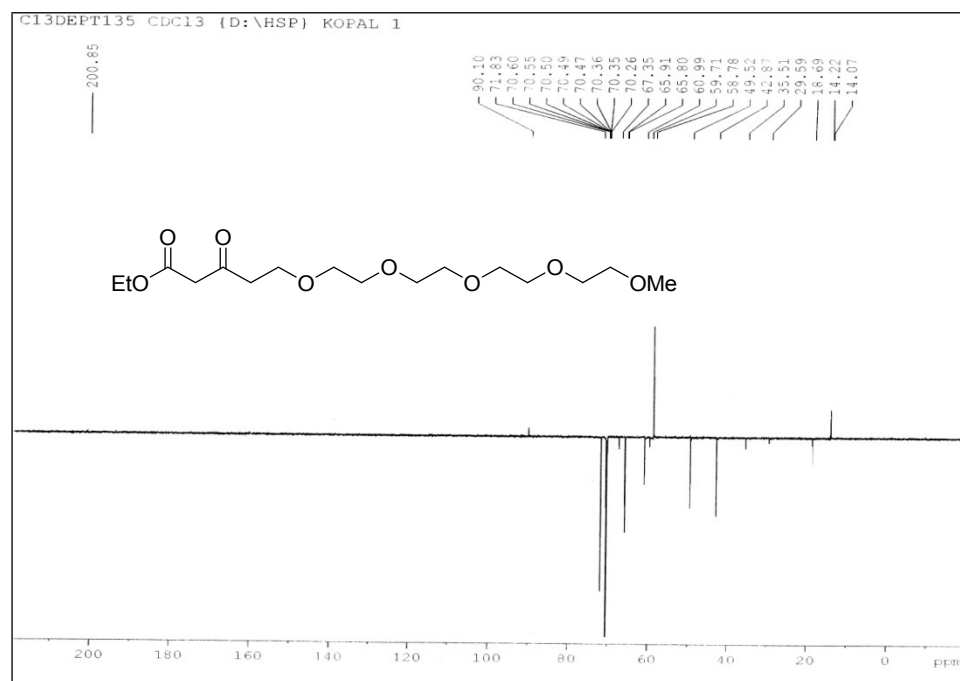

**Figure 38.** DEPT-135 NMR (100 MHz, CCl<sub>4</sub> + CDCl<sub>3</sub>, 1:1) spectrum of ethyl 17-oxo-2,5,8,11,14-pentaoxonadecan-19-oate **7d**.

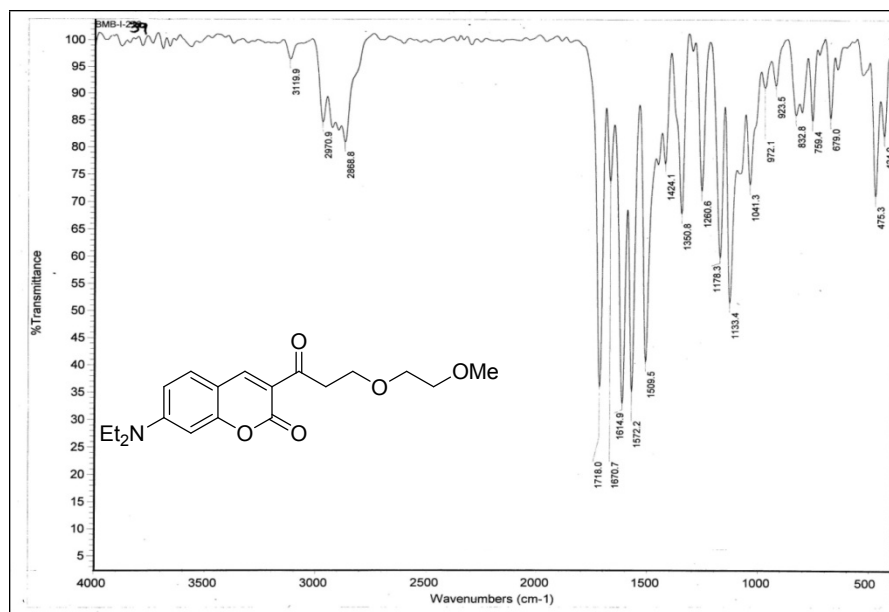

**Figure 39.** IR (KBr) spectrum of 7-(diethylamino)-3-[3-(2-methoxyethoxy)propanoyl]-2H-chromen-2-one **4a**.

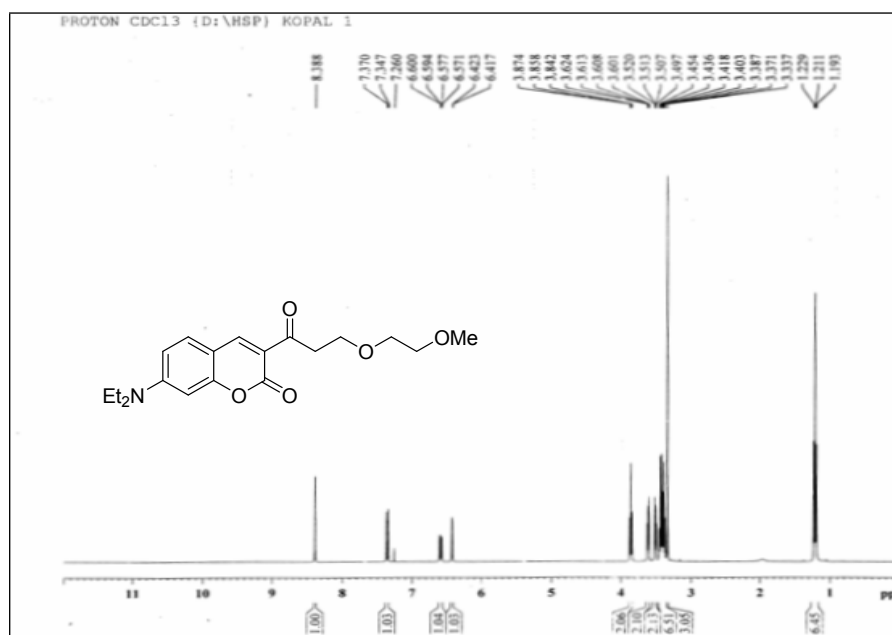

**Figure 40.** <sup>1</sup>H NMR (400 MHz, CCl<sub>4</sub> + CDCl<sub>3</sub>, 1:1) spectrum of 7-(diethylamino)-3-[3-(2-methoxyethoxy)propanoyl]-2H-chromen-2-one **4a**.

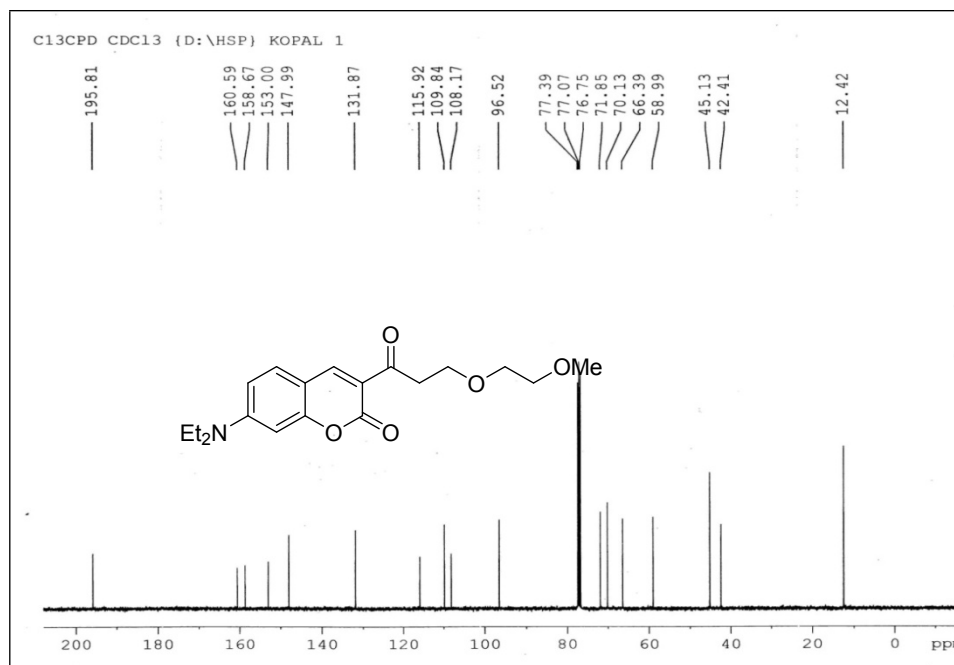

**Figure 41.** <sup>13</sup>C NMR (100 MHz, CCl<sub>4</sub> + CDCl<sub>3</sub>, 1:1) spectrum of 7-(diethylamino)-3-[3-(2-methoxyethoxy)propanoyl]-2*H*-chromen-2-one **4a**.

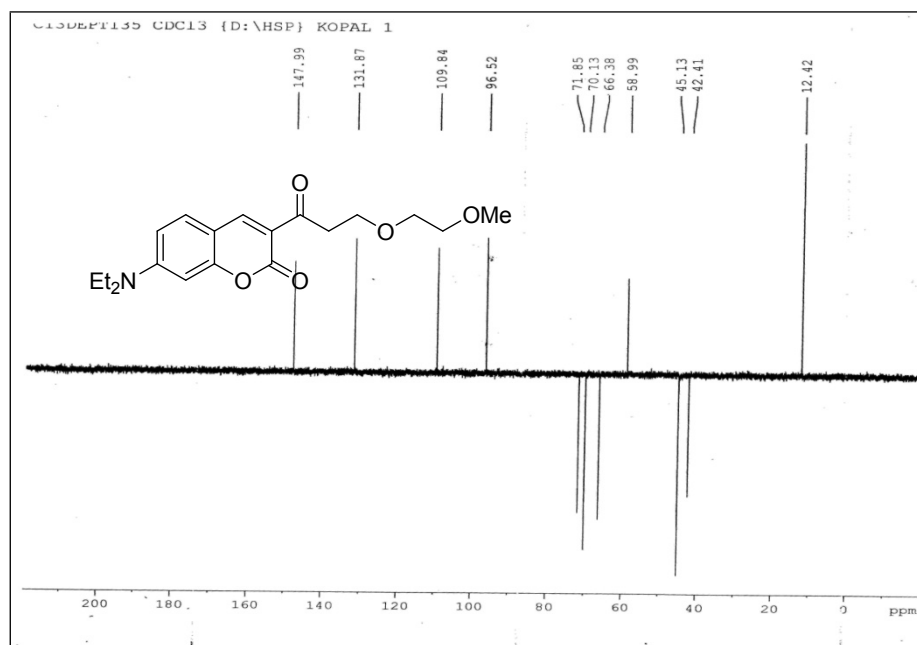

**Figure 42.** DEPT-135 NMR (100 MHz, CCl<sub>4</sub> + CDCl<sub>3</sub>, 1:1) spectrum of 7-(diethylamino)-3-[3-(2-methoxyethoxy)propanoyl]-2*H*-chromen-2-one **4a**.

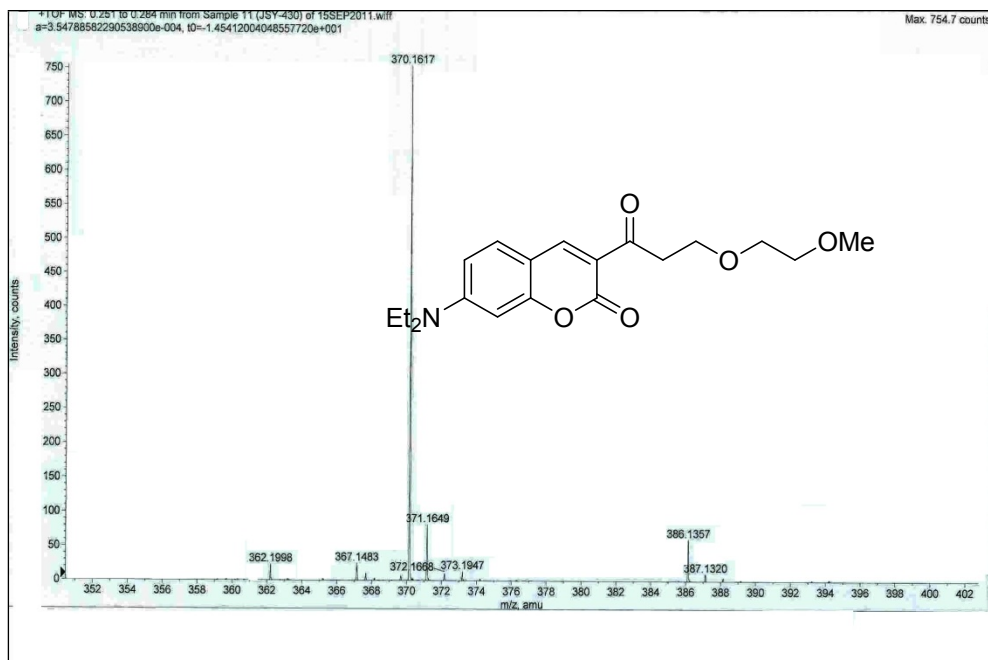

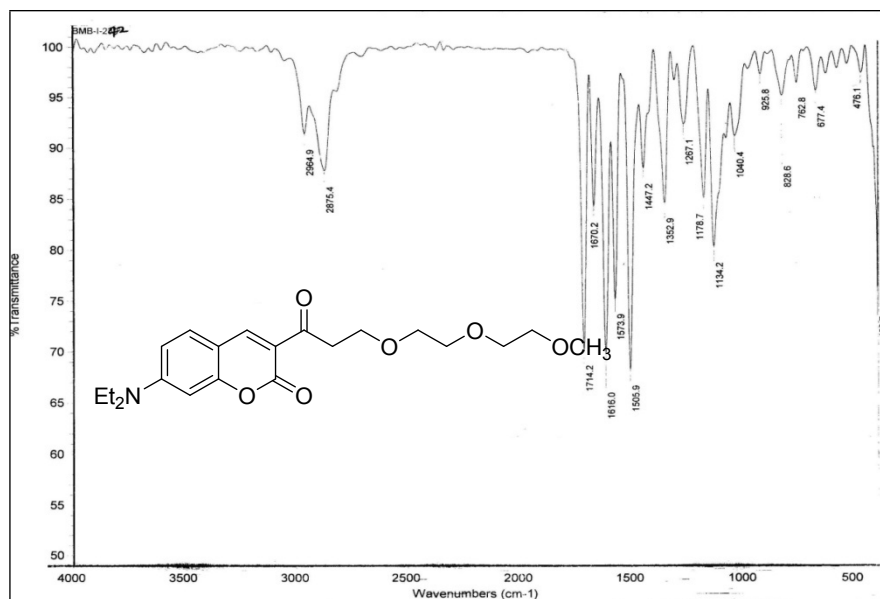

**Figure 44.** IR (KBr) spectrum of 7-(dimethylamino)-3-[3-[2-(2-methoxyethoxy)ethoxy]propanoyl]-2*H*-chromen-2-one **4b**.

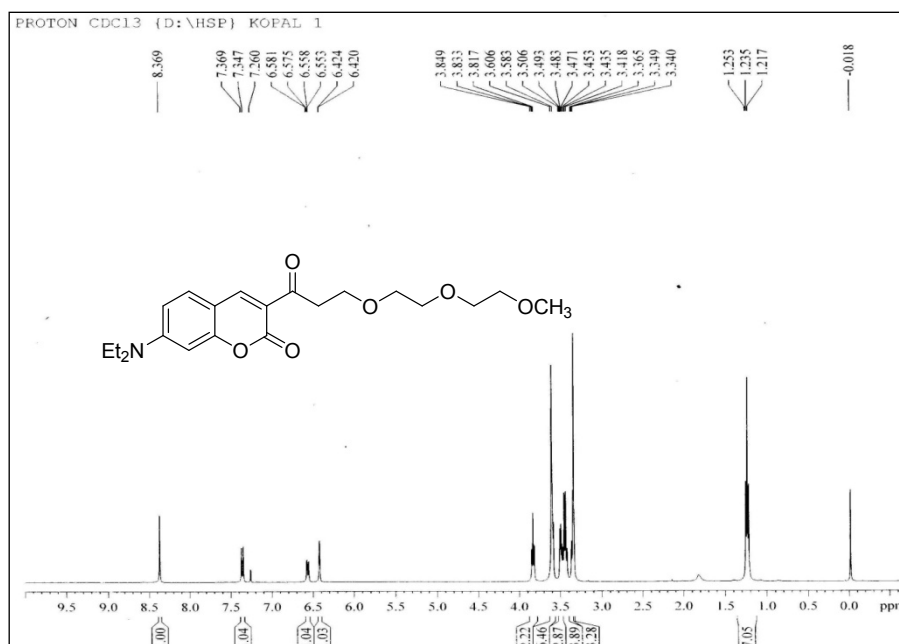

**Figure 45.**  $^1\text{H}$  NMR (400 MHz,  $\text{CCl}_4 + \text{CDCl}_3$ , 1:1) spectrum of 7-(dimethylamino)-3-[3-[2-(2-methoxyethoxy)ethoxy]propanoyl]-2*H*-chromen-2-one **4b**.

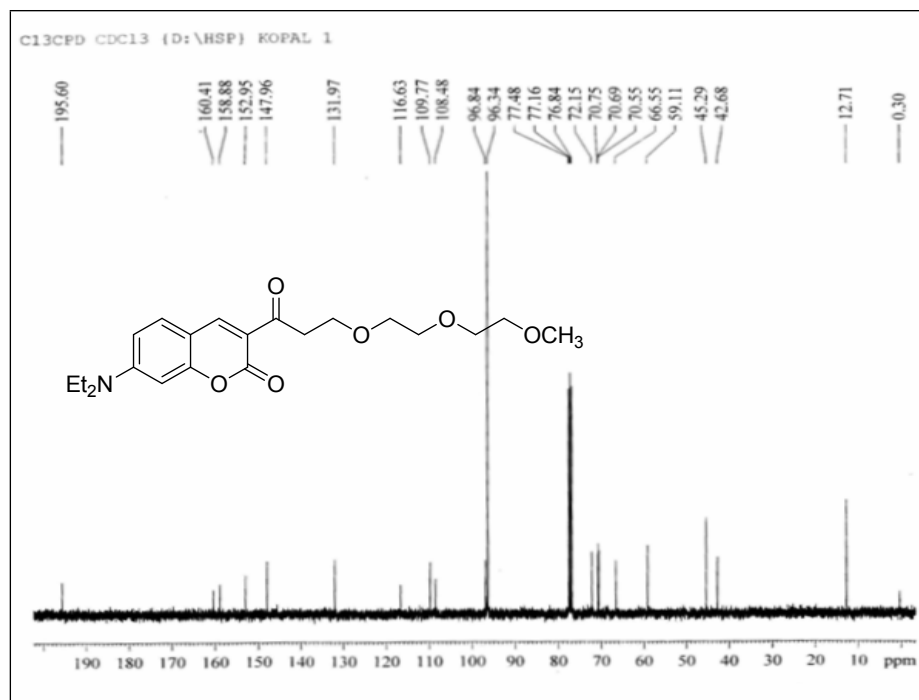

**Figure 46.**  $^{13}\text{C}$  NMR (100 MHz,  $\text{CCl}_4 + \text{CDCl}_3$ , 1:1) spectrum of 7-(dimethylamino)-3-[3-[2-(2-methoxyethoxy)ethoxy]propanoyl]-2H-chromen-2-one **4b**.

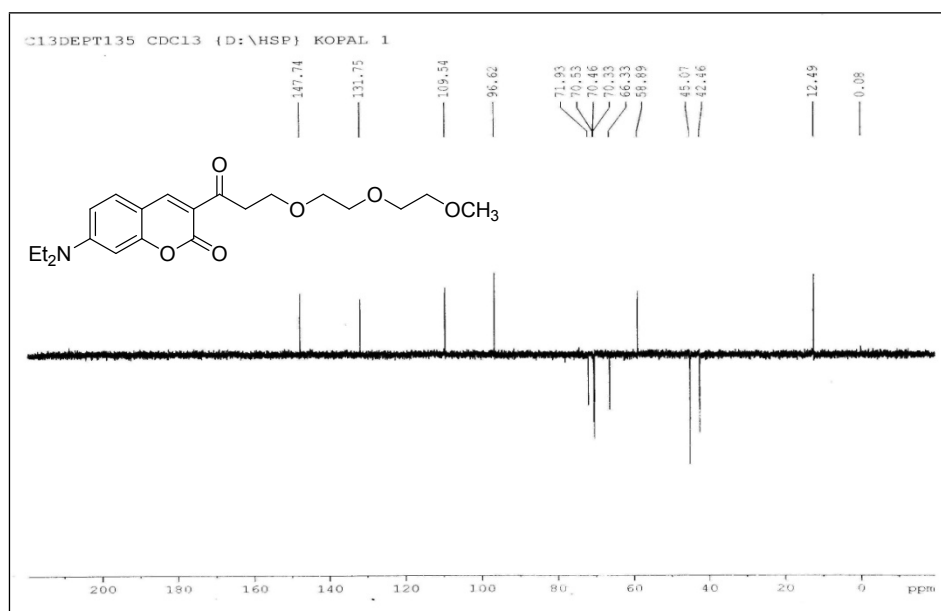

**Figure 47.** DEPT-135 NMR (100 MHz,  $\text{CCl}_4 + \text{CDCl}_3$ , 1:1) spectrum of 7-(dimethylamino)-3-[3-[2-(2-methoxyethoxy)ethoxy]propanoyl]-2H-chromen-2-one **4b**.

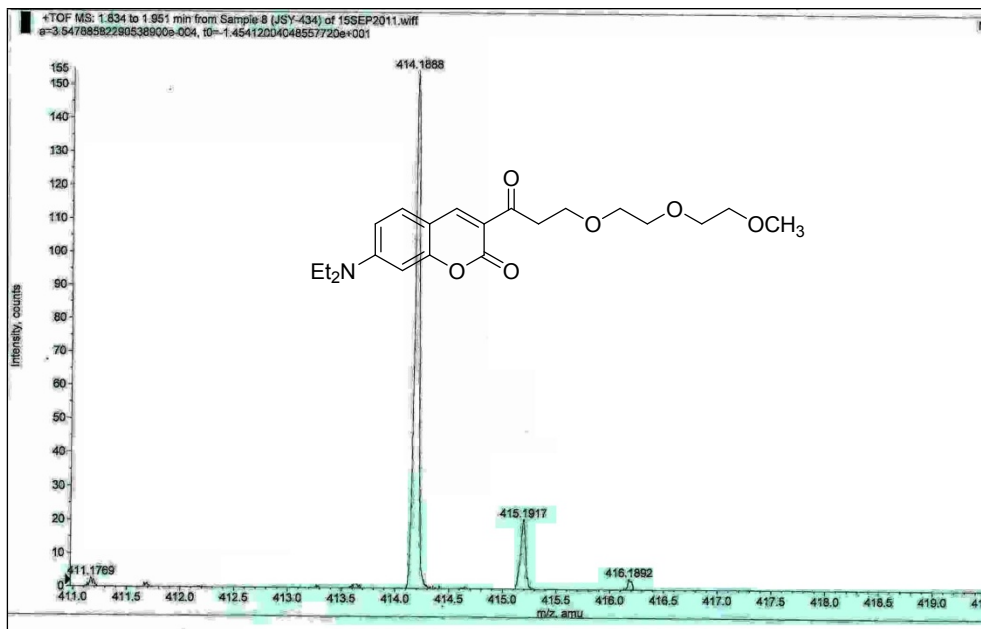

**Figure 48.** ESI-MS (HRMS) spectrum of 7-(dimethylamino)-3-[3-[2-(2-methoxyethoxy)ethoxy]propanoyl]-2*H*-chromen-2-one **4b**.

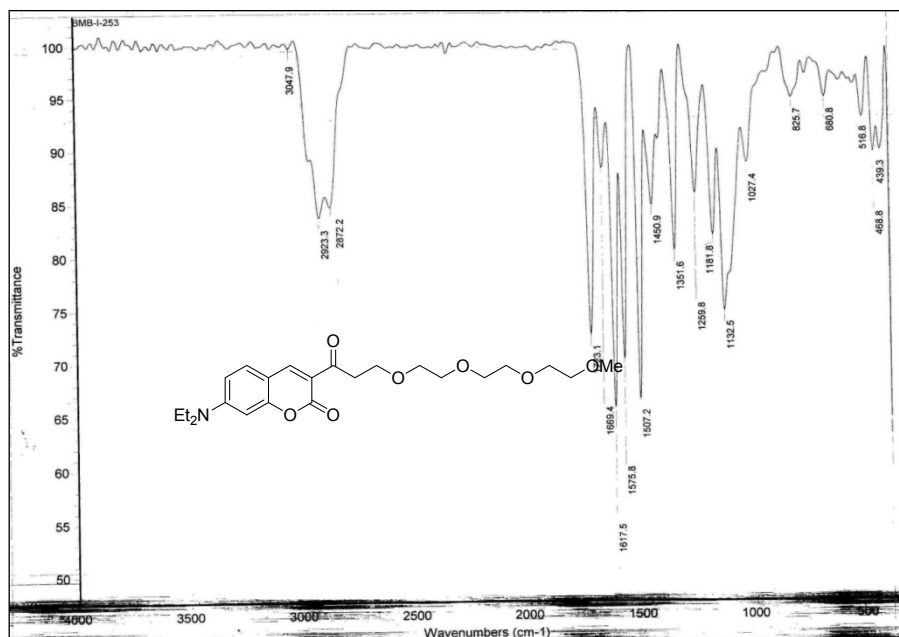

**Figure 49.** IR (KBr) spectrum of 7-(diethylamino)-3-[3-[2-[2-(2-methoxyethoxy)ethoxy]ethoxy]propanoyl]-2*H*-chromen-2-one **4c**.

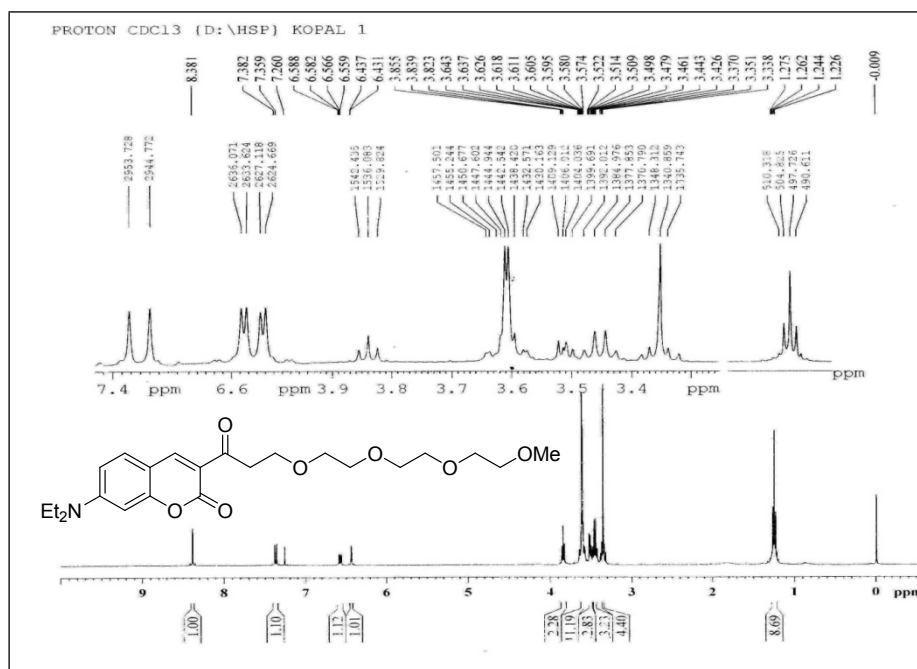

**Figure 50.**  $^1\text{H}$  NMR (400 MHz,  $\text{CCl}_4 + \text{CDCl}_3$ , 1:1) spectrum of 7-(diethylamino)-3-[3-[2-[2-(2-methoxyethoxy)ethoxy]ethoxy]propanoyl]-2*H*-chromen-2-one **4c**.



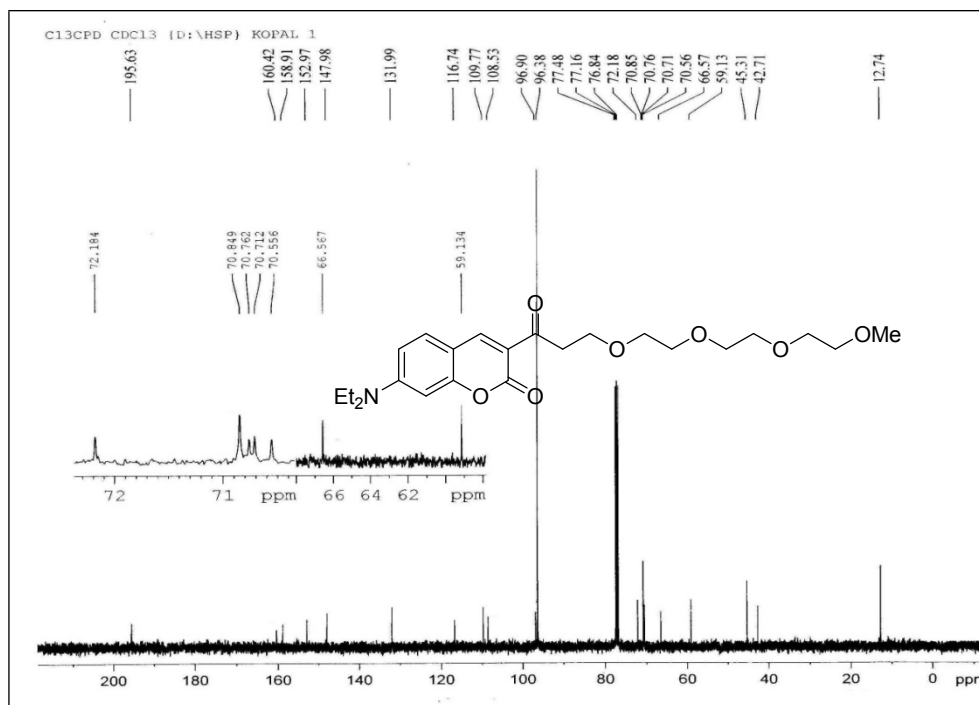

**Figure 51.** <sup>13</sup>C NMR (100 MHz, CCl<sub>4</sub> + CDCl<sub>3</sub>, 1:1) spectrum of 7-(diethylamino)-3-[3-[2-[2-(2-methoxyethoxy)ethoxy]ethoxy]propanoyl]-2H-chromen-2-one **4c**.

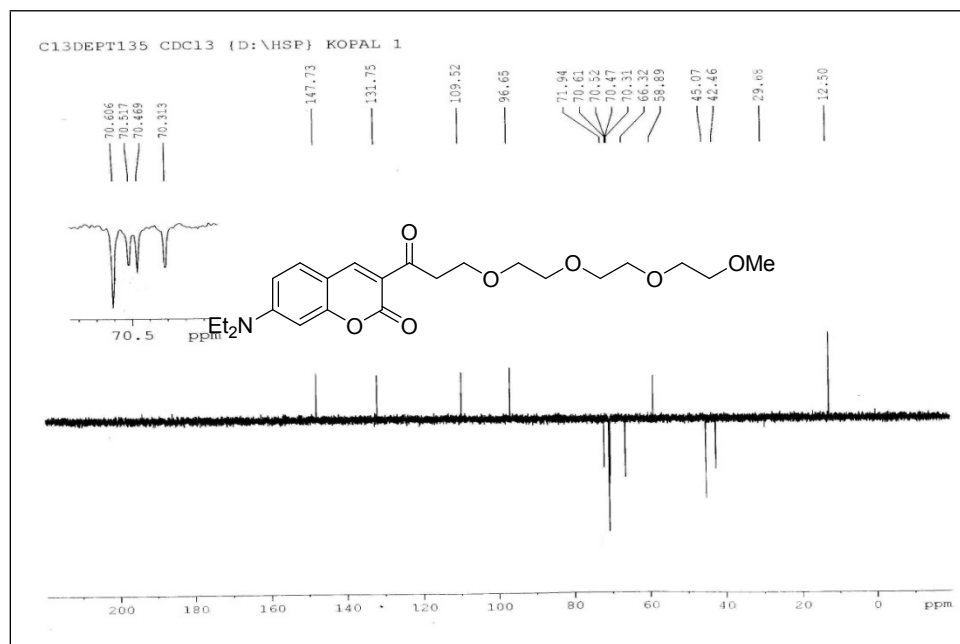

**Figure 52.** DEPT-135 NMR (100 MHz, CCl<sub>4</sub> + CDCl<sub>3</sub>, 1:1) spectrum of 7-(diethylamino)-3-[3-[2-[2-(2-methoxyethoxy)ethoxy]ethoxy]propanoyl]-2H-chromen-2-one **4c**.



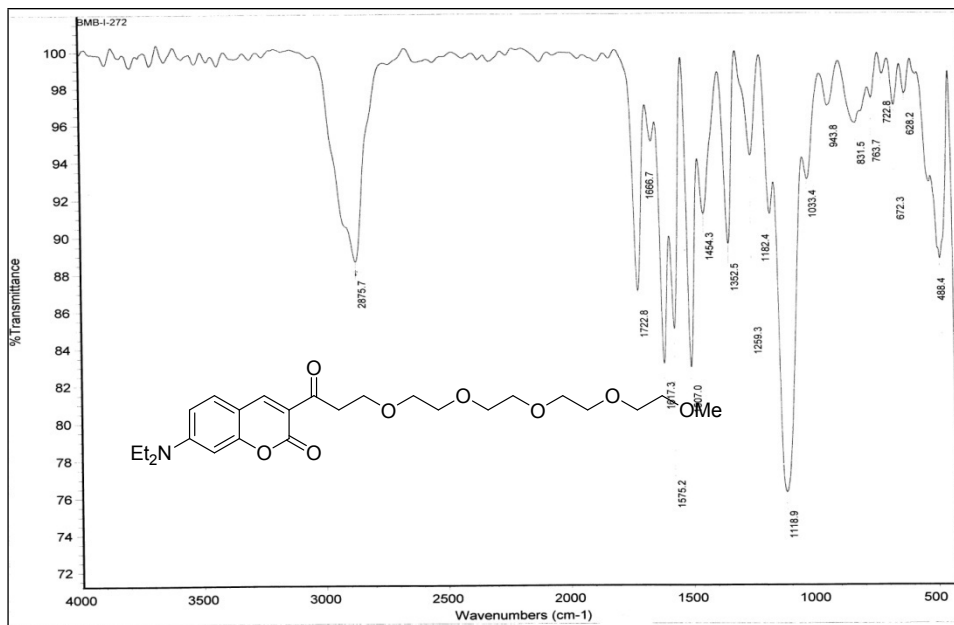

**Figure 54.** IR (KBr) spectrum of 7-(diethylamino)-3-[3-[2-[2-[2-(2-methoxyethoxy)ethoxy]ethoxy]ethoxy]ethoxy]propanoyl]-2*H*-chromen-2-one **4d**.

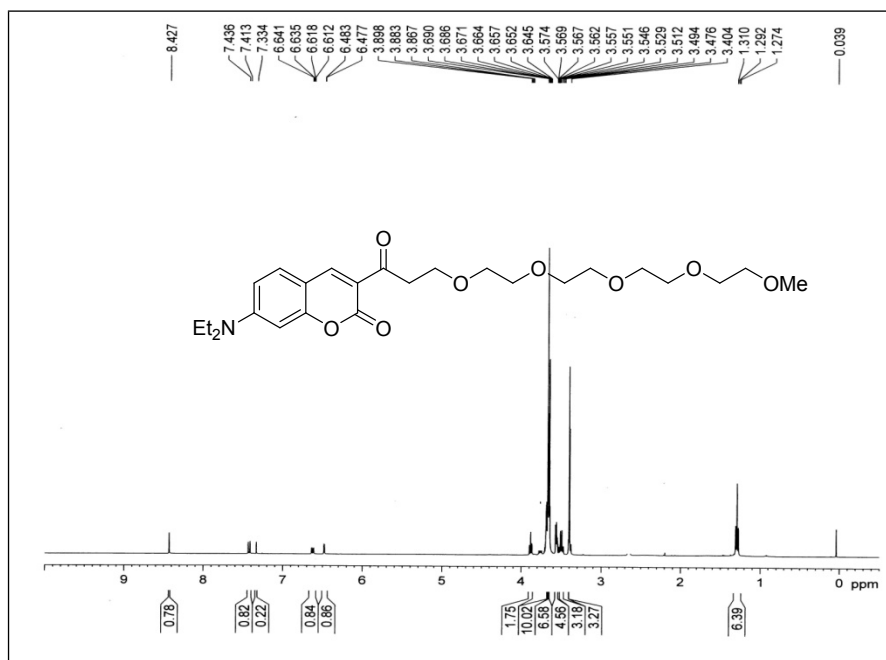

**Figure 55.**  $^1\text{H}$  NMR (400 MHz,  $\text{CCl}_4 + \text{CDCl}_3$ , 1:1) spectrum of 7-(diethylamino)-3-[3-[2-[2-[2-(2-methoxyethoxy)ethoxy]ethoxy]ethoxy]ethoxy]propanoyl]-2*H*-chromen-2-one **4d**.

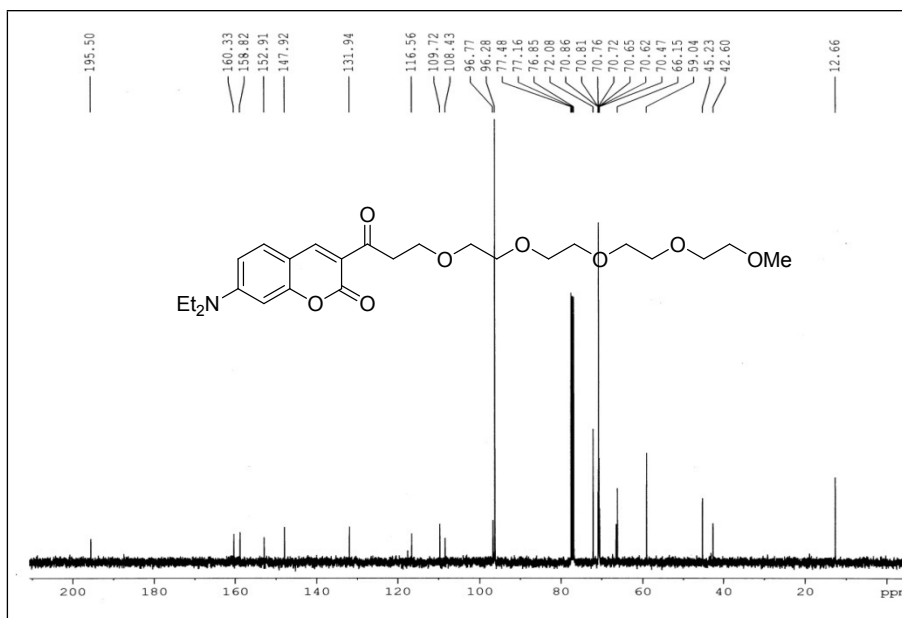

**Figure 56.**  $^{13}\text{C}$  NMR (100 MHz,  $\text{CCl}_4 + \text{CDCl}_3$ , 1:1) spectrum of 7-(diethylamino)-3-[3-[2-[2-[2-(2-methoxyethoxy)ethoxy]ethoxy]ethoxy]propanoyl]-2*H*-chromen-2-one **4d**.

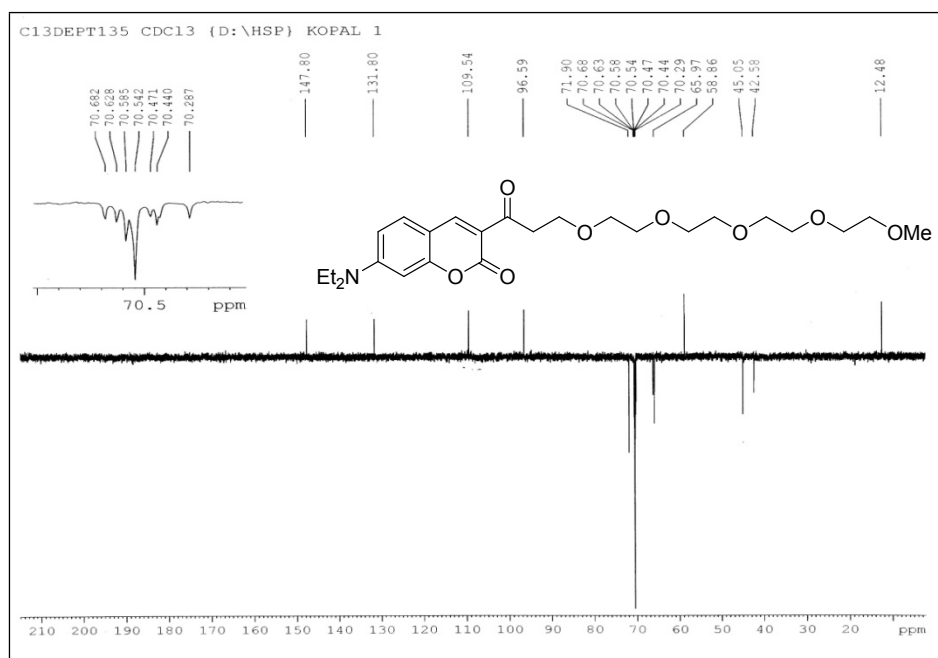

**Figure 57.** DEPT-135 NMR (100 MHz,  $\text{CCl}_4 + \text{CDCl}_3$ , 1:1) spectrum of 7-(diethylamino)-3-[3-[2-[2-[2-(2-methoxyethoxy)ethoxy]ethoxy]ethoxy]propanoyl]-2*H*-chromen-2-one **4d**.

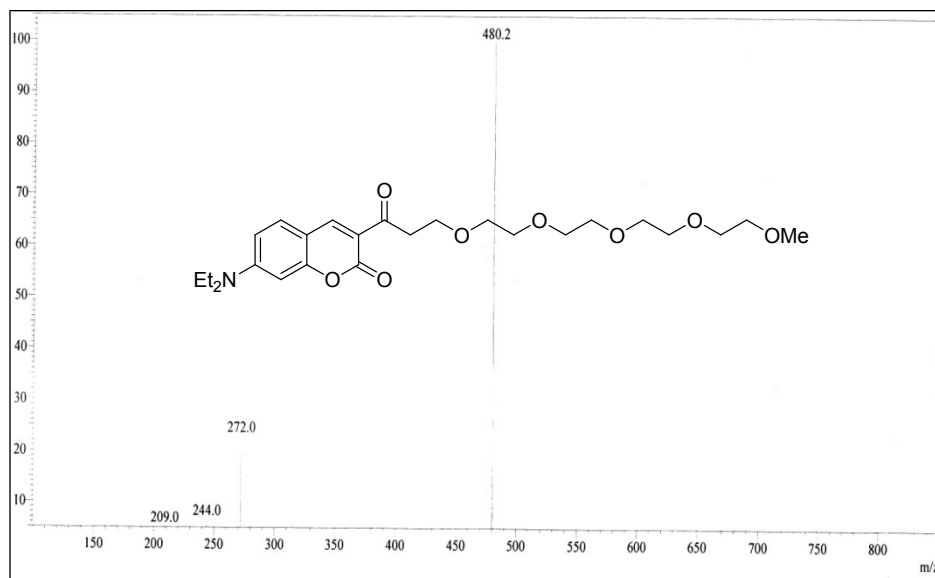

**Figure 58.** ESI-MS (HRMS) spectrum of 7-(diethylamino)-3-[3-[2-[2-[2-(2-methoxyethoxy)ethoxy]ethoxy]ethoxy]propanoyl]-2*H*-chromen-2-one **4d**.

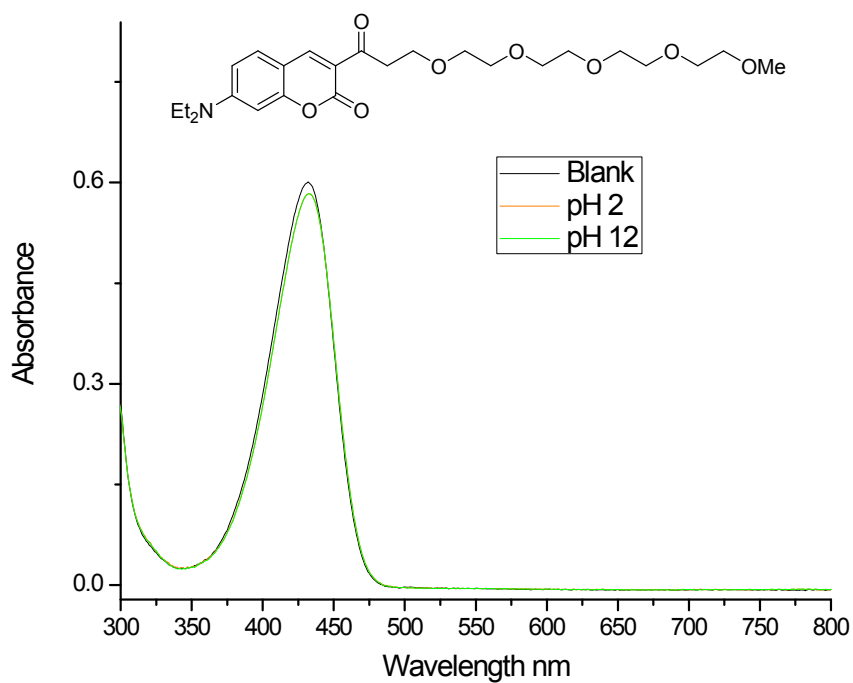

**Figure 59.** UV spectrum of **4d** recorded at pH 7, pH 2 and pH 12
